# Supplementary material for: A diversity-oriented novel regioselective synthesis of sulfonamide–thiazolidinone hybrids
Source: Royal Society of Chemistry journal article supplement (doi:10.1039/c9nj00055k), 2019-01-01

## Supporting Information

### A Diversity-Oriented Novel Regioselective Synthesis of Sulfonamide-Thiazolidinone Hybrids

Preeti,<sup>a</sup> and Krishna Nand Singh<sup>a\*</sup>

<sup>a</sup>Department of Chemistry (Centre of Advanced Study), Institute of Science,  
Banaras Hindu University, Varanasi-221005, India.

\*e-mail: knsingh@bhu.ac.in; knsinghbhu@yahoo.co.in

Phone: +91-1332-284751

#### Table of Contents

|                                                                                                |          |
|------------------------------------------------------------------------------------------------|----------|
| 1. Experimental Section .....                                                                  | S2.      |
| 2. Crystal Data & Structure of the Product <b>4a</b> .....                                     | S3.      |
| 3. Spectral Data of the Products <b>4a-4t</b> and Intermediate ( <b>I</b> ).....               | S4-S12.  |
| 4. Copies of <sup>1</sup> H and <sup>13</sup> C NMR Spectra of the Products <b>4a-4t</b> ..... | S13-S33. |

## 1. Experimental Section:

**General.**  $^1\text{H}$ NMR spectra were recorded on Jeol Resonance ECX-500II (500 MHz); Chemical shifts ( $\delta$  in ppm) and coupling constant ( $J$  in Hz) are calibrated either relative to internal solvent tetramethylsilane TMS ( $\delta_{\text{H}} = 0.00\text{ppm}$ ) or  $\text{CDCl}_3$  ( $\delta_{\text{H}} = 7.256\text{ ppm}$ ). In the  $^1\text{H}$  NMR data, the following abbreviations were used throughout: s = singlet, d = doublet, t = triplet, dd = double doublets, dt = double triplets, and brs = broad singlet.  $^{13}\text{C}$  NMR spectra were recorded on Jeol Resonance ECX-500II (125 MHz) in  $\text{CDCl}_3$ ; chemical shifts are calibrated relative to  $\text{CDCl}_3$  ( $\delta_{\text{C}} = 77.0\text{ ppm}$ ). IR spectra were recorded on Perkin Elmer FT-IR spectrometer -spectrum two. The reactions were monitored by Thin Layer Chromatography (TLC) using Merck silica gel plates (Merck<sup>®</sup> 60F<sub>254</sub>). Isothiocyanates and dialkylacetylene dicarboxylates were purchased from Alfa Aesar or Sigma Aldrich. The sulfonylhydrazides were prepared according to literature procedure.<sup>1</sup> Solvents were purified prior to its use.

**General Procedure for the Synthesis of Products 4a-4t:** Sulfonylhydrazide **1** (0.5 mmol), isothiocyanate **2** (0.5 mmol), dialkylacetylene dicarboxylate **3** (0.5 mmol) and ethanol (2 mL) were placed in a glass vessel, and then stirred at room temperature for 1 h. After completion of the reaction (TLC), a yellow solid product appeared, which was filtered and washed with cold ethanol to give the pure product **4**. The products were characterized based on FTIR,  $^1\text{H}$ -NMR,  $^{13}\text{C}$ -NMR and HRMS.

[1] F.-L. Yang, X.-T. Ma, S.-K. Tian, *Chem. Eur. J.* **2012**, *18*, 1582.

## 2. Crystal data of the Product 4a:

**Data block:** ups3310\_kns\_bhu\_0m

**Bond precision:** C-C = 0.0035 Å, **Wavelength** = 0.71073

**Cell:** a=9.050(5) b=10.325(5) c=11.792(5)

**Alpha**=97.739(5) **beta**=103.231(5) **gamma**=109.788(5)

**Temperature:** 293 K

**Calculated Reported**

**Volume** 981.8(8) 981.8(8)

**Space group** P -1 P-1

**Hall group** - P 1 ?

**Moiety formula** C<sub>19</sub> H<sub>17</sub> N<sub>3</sub> O<sub>5</sub> S<sub>2</sub>C<sub>19</sub> H<sub>17</sub> N<sub>3</sub> O<sub>5</sub> S<sub>2</sub>

**Sum formula** C<sub>19</sub> H<sub>17</sub> N<sub>3</sub> O<sub>5</sub> S<sub>2</sub> C<sub>19</sub> H<sub>17</sub> N<sub>3</sub> O<sub>5</sub> S<sub>2</sub>

**Mr** 431.48 431.48

**Dx, g cm<sup>-3</sup>** 1.459 1.459

**Z** 2 2

**Mu (mm<sup>-1</sup>)** 0.308 0.308

**F000** 448.0 448.0

**F000'** 448.70

**h, k, l<sub>max</sub>** 12,13,15 12,13,15

**N<sub>ref</sub>** 4889 4805

**T<sub>min</sub>, T<sub>max</sub>** 0.868, 0.879 0.965, 0.974

**T<sub>min</sub>'** 0.868

**Data completeness**= 0.983 **Theta(max)**= 28.340

**R(reflections)**=0.0448( 3772) **wR2(reflections)**=0.1530( 4805)

**S** = 1.085 **N<sub>par</sub>** = 270

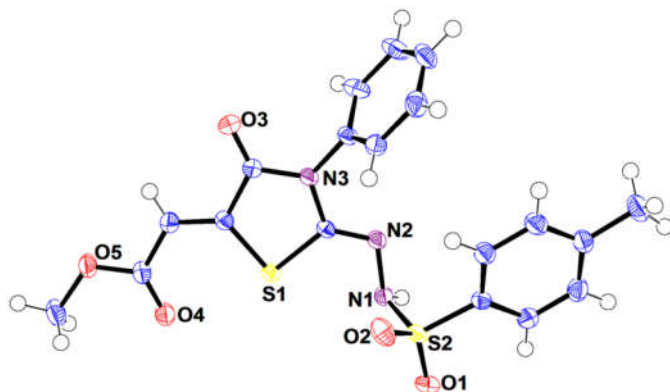

**Figure.** ORTEP diagram of a single crystal of product **4a** (CCDC 1843990).

### 3. Spectral Data of the Products:

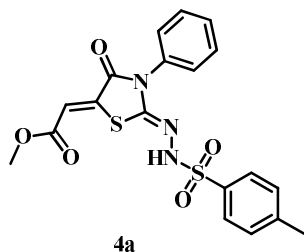

**(Z)-Methyl 2-((Z)-4-oxo-3-phenyl-2-(2-tosylhydrazono)thiazolidin-5-ylidene)acetate (4a)<sup>2</sup>:** Pale yellow solid (91 %), m.p. 220-221 °C. IR (4000-600 cm<sup>-1</sup>):  $\nu_{\max}$  = 3424, 3181, 1714, 1699, 1639, 1610. <sup>1</sup>H NMR (CDCl<sub>3</sub>, 500 MHz):  $\delta_{\text{H}}$  (ppm) 7.62 (d, 2H,  $J$  = 8.5 Hz, ArH), 7.43- 7.50 (m, 3H, ArH), 7.193 (d, 2H,  $J$  = 8.0 Hz, ArH), 7.26-7.29 (m, 2H, ArH), 7.00 (s, 1H, CH), 6.56 (s, NH), 3.89 (s, 3H, OCH<sub>3</sub>), 2.39 (s, 3H, CH<sub>3</sub>). <sup>13</sup>C NMR (CDCl<sub>3</sub>, 125 MHz):  $\delta_{\text{C}}$  (ppm) 166.0, 164.1, 161.6, 144.6, 139.6, 134.1, 133.2, 129.4, 129.1, 128.5, 127.5, 117.9, 52.8, 21.6.

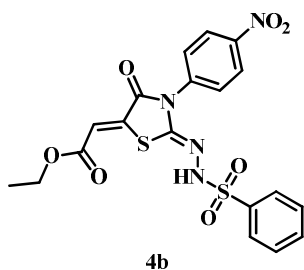

**(Z)-Ethyl 2-((Z)-3-(4-nitrophenyl)-4-oxo-2-(2-(phenylsulfonyl)hydrazono)thiazolidin-5-ylidene)acetate (4b):** Yellow solid (89 %), m.p. 217-218 °C. IR (4000-600 cm<sup>-1</sup>):  $\nu_{\max}$  = 3553, 3308, 3244, 3056, 2986, 2863, 1711, 1638, 1610, 1520. <sup>1</sup>H NMR (CDCl<sub>3</sub>, 500 MHz):  $\delta_{\text{H}}$  (ppm) 8.30 (d, 2H,  $J$  = 9.0 Hz, ArH), 7.76 (d, 2H,  $J$  = 8.0 Hz, ArH), 7.61 (t, 1H,  $J$  = 7.0 Hz, ArH), 7.40-7.52 (m, 4H, ArH), 7.02 (s, 1H, CH), 6.77 (brs, NH), 4.35 (q, 2H,  $J$  = 7.0 Hz, CH<sub>2</sub>), 1.36 (t, 3H,  $J$  = 7.0 Hz, CH<sub>3</sub>). <sup>13</sup>C NMR (CDCl<sub>3</sub>, 125 MHz):  $\delta_{\text{C}}$  (ppm) 165.4 (CO), 163.4 (COO), 159.8 (C=N), 147.6 (Ar), 138.4 (CH), 138.4 (Ar), 137.0 (Ar), 133.9 (Ar), 128.9 (Ar), 128.6 (Ar), 128.4 (Ar), 124.3 (Ar), 119.3 (=C), 62.3 (CH<sub>2</sub>), 14.2 (CH<sub>3</sub>). HR-MS (ESI) for C<sub>19</sub>H<sub>16</sub>N<sub>4</sub>O<sub>7</sub>S<sub>2</sub> m/z [M + H]<sup>+</sup> calcd.: 477.0538, found: 477.0549; [2M + H]<sup>+</sup> calcd.: 953.0998, found: 953.1011.

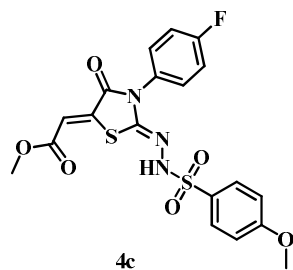

**(Z)-Methyl 2-((Z)-3-(4-fluorophenyl)-2-(2-((4-methoxyphenyl)sulfonyl)hydrazono)-4-oxothiazolidin-5-ylidene)acetate (4c):** Yellow solid (81 %), m.p. 225-226 °C. IR (4000-600  $\text{cm}^{-1}$ ):  $\nu_{\text{max}}$  = 3168, 3053, 1714, 1690, 1640, 1598, 1510.  $^1\text{H}$  NMR ( $\text{CDCl}_3$ , 500 MHz):  $\delta_{\text{H}}$  (ppm) 7.66 (d, 2H,  $J$  = 9.0 Hz, ArH), 7.15 (t, 2H,  $J$  = 8.0 Hz, ArH), 7.21-7.27 (m, 2H, merge with  $\text{CDCl}_3$ , ArH), 6.86 (d, 2H,  $J$  = 9.0 Hz, ArH), 6.97 (s, 1H, CH), 6.92 (brs, NH), 3.85 (s, 3H,  $\text{CH}_3$ ), 4.33 (q, 2H,  $J$  = 7.5 Hz,  $\text{CH}_2$ ), 1.35 (t, 3H,  $J$  = 7.0 Hz,  $\text{CH}_3$ ).  $^{13}\text{C}$  NMR ( $\text{CDCl}_3$ , 125 MHz):  $\delta_{\text{C}}$  (ppm) 165.5 (CO), 163.9 (d,  $J$  = 40 Hz, Ar), 163.5 (COO), 161.6 (Ar), 160.2 (C=N), 139.2 (CH), 130.6 (Ar), 129.5 (d,  $J$  = 8.7 Hz, Ar), 129.1 (Ar), 128.6 (Ar), 118.4 (=C), 116.2 (d,  $J$  = 23.7 Hz, Ar), 113.9 (CH), 62.1 ( $\text{OCH}_2$ ), 55.7 ( $\text{OCH}_3$ ), 14.2 ( $\text{CH}_3$ ). HR-MS (ESI) for  $\text{C}_{20}\text{H}_{18}\text{N}_3\text{O}_6\text{S}_2\text{F}$   $m/z$   $[\text{M} + \text{H}]^+$  calcd.: 480.0699, found: 480.0711;  $[2\text{M} + \text{H}]^+$  calcd.: 959.132, found: 959.1345.

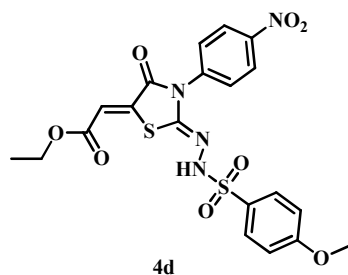

**(Z)-Ethyl 2-((Z)-2-(2-((4-methoxyphenyl)sulfonyl)hydrazono)-3-(4-nitrophenyl)-4-oxothiazolidin-5-ylidene)acetate (4d):** Yellow solid (87 %), m.p. > 250 °C. IR (4000-600  $\text{cm}^{-1}$ ):  $\nu_{\text{max}}$  = 3172, 1715, 1693, 1612, 1595, 1525.  $^1\text{H}$  NMR ( $\text{DMSO}-d_6$ , 500 MHz):  $\delta_{\text{H}}$  (ppm) 10.33 (brs, NH), 8.36 (d, 2H,  $J$  = 8.5 Hz, ArH), 7.65 (d, 2H,  $J$  = 9.0 Hz, ArH), 7.59 (d, 2H,  $J$  = 8.5 Hz, ArH), 7.01 (d, 2H,  $J$  = 9.0 Hz, ArH), 6.82 (s, 1H, CH), 4.30 (q, 2H,  $J$  = 7.0 Hz,  $\text{OCH}_2$ ), 3.82 (s, 3H,  $\text{CH}_3$ ), 1.29 (t, 3H,  $J$  = 7.0 Hz,  $\text{CH}_3$ ).  $^{13}\text{C}$  NMR ( $\text{DMSO}-d_6$ , 125 MHz):  $\delta_{\text{C}}$  (ppm) 166.0 (CO), 163.7 (COO), 163.4 (Ar), 147.8 (C=N), 141.3 (Ar), 139.7 (CH), 130.7 (Ar), 130.0 (Ar), 129.7 (Ar), 124.6 (Ar), 116.5 (=C), 114.5 (Ar), 62.2 ( $\text{OCH}_2$ ), 56.2 ( $\text{OCH}_3$ ), 14.6 ( $\text{CH}_3$ ). HR-MS (ESI) for  $\text{C}_{20}\text{H}_{18}\text{N}_4\text{O}_8\text{S}_2$   $m/z$   $[\text{M} + \text{H}]^+$  calcd.: 507.0644, found: 507.0658.

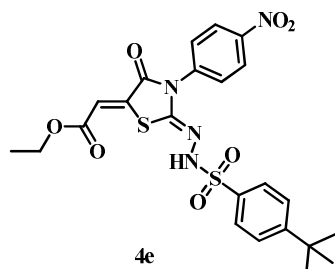

**(Z)-Ethyl 2-((Z)-2-(2-((4-tert-butyl)phenyl)sulfonyl)hydrazono)-3-(4-nitrophenyl)-4-oxothiazolidin-5-ylidene)acetate (4e):** Light yellow solid (86 %), m.p. > 250 °C. IR (4000-600 cm<sup>-1</sup>):  $\nu_{\max}$  = 3423, 3155, 3063, 2965, 1719, 1694, 1644, 1615, 1595, 1530. <sup>1</sup>H NMR (CDCl<sub>3</sub>, 500 MHz):  $\delta_{\text{H}}$  (ppm) 8.29 (d, 2H,  $J$  = 8.5 Hz, ArH), 7.69 (d, 2H,  $J$  = 8.5 Hz, ArH), 7.50 (d, 2H,  $J$  = 9.0 Hz, ArH), 7.46 (d, 2H,  $J$  = 8.5 Hz, ArH), 7.02 (s, 1H, CH), 6.70 (brs, NH), 4.35 (q, 2H,  $J$  = 7.0 Hz, OCH<sub>2</sub>), 1.37 (t, 3H,  $J$  = 7.5 Hz, CH<sub>3</sub>), 1.32 (s, 9H, (CH<sub>3</sub>)<sub>3</sub>). <sup>13</sup>C NMR (CDCl<sub>3</sub>, 125 MHz):  $\delta_{\text{C}}$  (ppm) 165.5 (CO), 163.5 (COO), 160.0 (Ar), 158.1 (Ar), 147.7 (C=N), 138.5 (CH), 134.0 (Ar), 128.7 (Ar), 128.3 (Ar), 126.0 (Ar), 124.3 (Ar), 119.3 (=C), 62.4 (OCH<sub>2</sub>), 35.4 (C(CH<sub>3</sub>)<sub>3</sub>), 31.1 (CH<sub>3</sub>), 14.2 (CH<sub>3</sub>). HR-MS (ESI) for C<sub>23</sub>H<sub>24</sub>N<sub>4</sub>O<sub>7</sub>S<sub>2</sub> m/z [M + H]<sup>+</sup> calcd.: 533.1164, found: 533.1179.

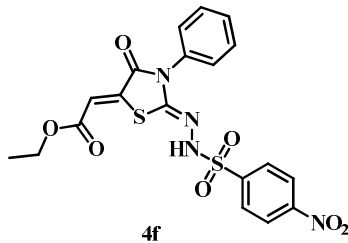

**(Z)-Ethyl 2-((Z)-2-(2-((4-nitrophenyl)sulfonyl)hydrazono)-4-oxo-3-phenylthiazolidin-5-ylidene)acetate (4f):** Light yellow solid (89 %), m.p. 225-226 °C. IR (4000-600 cm<sup>-1</sup>):  $\nu_{\max}$  = 3324, 3251, 3185, 3058, 2980, 1720, 1688, 1638, 1611. <sup>1</sup>H NMR (CDCl<sub>3</sub>, 500 MHz):  $\delta_{\text{H}}$  (ppm) 8.19 (d, 2H,  $J$  = 9.0 Hz, ArH), 7.88 (d, 2H,  $J$  = 8.5 Hz, ArH), 7.49-7.54 (m, 3H, ArH), 7.23-7.28 (m, 2H, merged with CDCl<sub>3</sub>, ArH), 7.01 (s, 1H, CH), 6.70 (brs, NH), 4.35 (q, 2H,  $J$  = 7.0 Hz, CH<sub>2</sub>), 1.36 (t, 3H,  $J$  = 7.5 Hz, CH<sub>3</sub>). <sup>13</sup>C NMR (DMSO-d<sub>6</sub>, 125 MHz):  $\delta_{\text{C}}$  (ppm) 165.5 (CO), 163.5 (COO), 150.0 (Ar), 140.7 (C=N, CH), 133.6 (Ar), 129.8 (Ar), 129.5 (Ar), 129.0 (Ar), 128.9 (Ar), 127.9 (Ar), 124.4 (Ar), 123.9 (Ar), 115.9 (=C), 61.7 (OCH<sub>2</sub>), 14.0 (CH<sub>3</sub>). HR-MS (ESI) for C<sub>19</sub>H<sub>16</sub>N<sub>4</sub>O<sub>7</sub>S<sub>2</sub> m/z [M + H]<sup>+</sup> calcd.: 477.0538, found: 477.0552; [2M + Na]<sup>+</sup> calcd.: 975.0818, found: 975.0826.

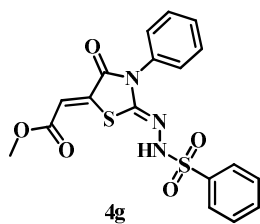

**(Z)-Methyl 2-((Z)-4-oxo-3-phenyl-2-(2-(phenylsulfonyl)hydrazono)thiazolidin-5-ylidene)acetate (4g):** Yellow solid (85 %), m.p. 206-207 °C. IR (4000-600 cm<sup>-1</sup>):  $\nu_{\max}$  = 3168, 3069, 2953, 1716, 1694, 1637, 1611. <sup>1</sup>H NMR (CDCl<sub>3</sub>, 500 MHz):  $\delta_{\text{H}}$  (ppm) 7.73 (d, 2H,  $J$  = 7.5 Hz, ArH), 7.55 (t, 1H,  $J$  = 7.5 Hz, ArH), 7.42-7.48 (m, 3H, ArH), 7.39 (t, 2H,  $J$  = 8.0 Hz, ArH), 7.20-7.27 (m, 2H, ArH), 7.00 (s, 1H, CH), 6.67 (brs, NH), 3.88 (s, 3H, CH<sub>3</sub>). <sup>13</sup>C NMR (CDCl<sub>3</sub>, 125 MHz):  $\delta_{\text{C}}$  (ppm) 166.0 (CO), 164.0 (COO), 161.5 (C=N), 139.6 (CH), 137.0 (Ar), 133.6 (Ar), 133.2 (Ar), 129.4 (Ar), 129.2 (Ar), 128.7 (Ar), 128.5 (Ar), 127.5 (Ar), 118.0 (=C), 52.8 (OCH<sub>3</sub>). HR-MS (ESI) for C<sub>18</sub>H<sub>15</sub>N<sub>3</sub>O<sub>5</sub>S<sub>2</sub> m/z [M + H]<sup>+</sup> calcd.: 418.0531, found: 418.0540.

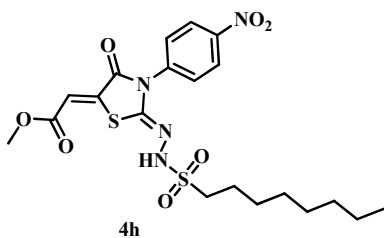

**(Z)-Methyl 2-((Z)-3-(4-nitrophenyl)-2-(2-(octylsulfonyl)hydrazono)-4-oxothiazolidin-5-ylidene)acetate (4h):** Yellow solid (83 %), m.p. 185-186 °C. IR (4000-600  $\text{cm}^{-1}$ ):  $\nu_{\text{max}}$  = 3166, 2924, 2858, 1715, 1697, 1635, 1608, 1524.  $^1\text{H}$  NMR ( $\text{CDCl}_3$ , 500 MHz):  $\delta_{\text{H}}$  (ppm) 8.38 (d, 2H,  $J$  = 9.0 Hz, ArH), 7.62 (d, 2H,  $J$  = 9.0 Hz, ArH), 7.048 (s, 1H, CH), 6.76 (brs, NH), 3.90 (s, 3H,  $\text{OCH}_3$ ), 3.08 (t, 2H,  $J$  = 8.0 Hz,  $\text{CH}_2$ ), 1.77 (p, 2H,  $J$  = 7.5 Hz,  $\text{CH}_2$ ), 1.32-1.40 (m, 2H,  $\text{CH}_2$ ), 1.15-1.30 (m, 8H,  $(\text{CH}_2)_4$ ), 0.870 (t, 3H,  $J$  = 6.5 Hz,  $\text{CH}_3$ ).  $^{13}\text{C}$  NMR ( $\text{CDCl}_3$ , 125 MHz):  $\delta_{\text{C}}$  (ppm) 165.8 (CO), 163.6 (COO), 161.6 (C=N), 147.7 (Ar), 138.7 (CH), 138.5 (Ar), 128.6 (Ar), 124.6 (Ar), 118.9 (=C), 53.0 ( $\text{CH}_2$ ), 50.2 ( $\text{OCH}_3$ ), 31.7 ( $\text{CH}_2$ ), 28.9 ( $\text{CH}_2$ ), 28.9 ( $\text{CH}_2$ ), 28.2 ( $\text{CH}_2$ ), 23.2 ( $\text{CH}_2$ ), 22.6 ( $\text{CH}_2$ ), 14.0 ( $\text{CH}_3$ ). HR-MS (ESI) for  $\text{C}_{20}\text{H}_{26}\text{N}_4\text{O}_7\text{S}_2$   $m/z$  [ $\text{M} + \text{H}$ ] $^+$  calcd.: 499.1321, found: 499.1338.

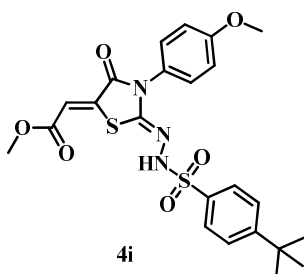

**(Z)-Methyl 2-((Z)-2-(2-((tert-butyl)phenyl)sulfonyl)hydrazono)-3-(4-methoxyphenyl)-4-oxothiazolidin-5-ylidene)acetate (4i):** Yellow solid (80 %), m.p. 188-189 °C. IR (4000-600  $\text{cm}^{-1}$ ):  $\nu_{\text{max}}$  = 3417, 3154, 3077, 2962, 1713, 1695, 1641, 1608, 1513.  $^1\text{H}$  NMR ( $\text{CDCl}_3$ , 500 MHz):  $\delta_{\text{H}}$  (ppm) 7.67 (d, 2H,  $J$  = 8.5 Hz, ArH), 7.41 (d, 2H,  $J$  = 8.5 Hz, ArH), 7.16 (d, 2H,  $J$  = 8.5 Hz, ArH), 6.98 (s, 1H, CH), 6.95 (d, 2H,  $J$  = 9.0 Hz, ArH), 6.66 (brs, NH), 3.87 (s, 3H,  $\text{OCH}_3$ ), 3.84 (s, 3H,  $\text{OCH}_3$ ), 1.31 (s, 9H,  $(\text{CH}_3)_3$ ).  $^{13}\text{C}$  NMR ( $\text{CDCl}_3$ , 125 MHz):  $\delta_{\text{C}}$  (ppm) 166.1 (CO), 164.4 (COO), 162.1 (Ar), 160.1 (C=N), 157.6 (Ar), 139.9 (CH), 134.1 (Ar), 128.8 (Ar), 128.5 (Ar), 125.8 (Ar), 117.9 (=C), 114.5 (Ar), 55.6 ( $\text{OCH}_3$ ), 52.9 ( $\text{OCH}_3$ ), 35.3 ( $\text{C}(\text{CH}_3)_3$ ), 31.1 ( $\text{CH}_3$ ). HR-MS (ESI) for  $\text{C}_{23}\text{H}_{25}\text{N}_3\text{O}_6\text{S}_2$   $m/z$  [ $\text{M} + \text{H}$ ] $^+$  calcd.: 504.1263, found: 504.1277; [ $2\text{M} + \text{Na}$ ] $^+$  calcd.: 1029.2268, found: 1029.2284.

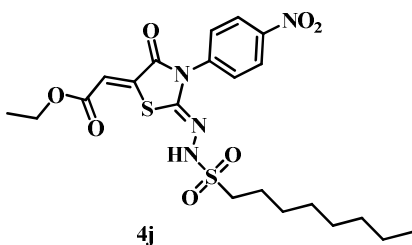

**(Z)-Ethyl 2-((Z)-3-(4-nitrophenyl)-2-(2-(octylsulfonyl)hydrazono)-4-oxothiazolidin-5-ylidene)acetate (4j):**

Light yellow solid (84 %), m.p. 171-172 °C. IR (4000-600  $\text{cm}^{-1}$ ):  $\nu_{\text{max}}$  = 3436, 3138, 2925, 2856, 1731, 1686, 1632, 1612, 1525.  $^1\text{H}$  NMR ( $\text{CDCl}_3$ , 500 MHz):  $\delta_{\text{H}}$  (ppm) 8.37 (d, 2H,  $J$  = 8.5 Hz, ArH), 7.61 (d, 2H,  $J$  = 6.5 Hz, ArH), 7.04 (s, 1H, CH), 6.59 (m, NH), 4.35 (q, 2H,  $J$  = 6.5 Hz,  $\text{OCH}_2$ ), 3.08 (t, 2H,  $J$  = 8.0 Hz,  $\text{CH}_2$ ), 1.76 (p, 2H,  $J$  = 8.0 Hz,  $\text{CH}_2$ ), 1.31-1.40 (m, 5H,  $\text{CH}_2$  and  $\text{CH}_3$ ), 1.17-1.30 (m, 8H,  $(\text{CH}_2)_2$ ), 0.87 (t, 3H,  $J$  = 6.5 Hz,  $\text{CH}_3$ ).  $^{13}\text{C}$  NMR ( $\text{CDCl}_3$ , 125 MHz):  $\delta_{\text{C}}$  (ppm) 165.4 (CO), 163.7 (COO), 147.8 (Ar), 138.5 (C=N), 138.4 (CH), 128.6 (Ar), 124.6 (Ar), 119.6 (Ar), 62.4 ( $\text{OCH}_2$ ), 50.3 ( $\text{CH}_2$ ), 31.7 ( $\text{CH}_2$ ), 29.0 ( $\text{CH}_2$ ), 28.9 ( $\text{CH}_2$ ), 28.2 ( $\text{CH}_2$ ), 23.3 ( $\text{CH}_2$ ), 22.7 ( $\text{CH}_2$ ), 14.2 ( $\text{CH}_3$ ), 14.1 ( $\text{CH}_3$ ). HR-MS (ESI) for  $\text{C}_{21}\text{H}_{28}\text{N}_4\text{O}_7\text{S}_2$   $m/z$   $[\text{M} + \text{H}]^+$  calcd.: 513.1477, found: 513.1493.

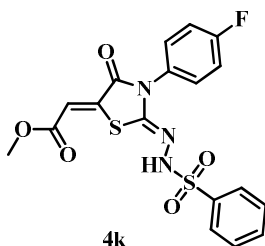**(Z)-Methyl 2-((Z)-3-(4-fluorophenyl)-4-oxo-2-(2-(phenylsulfonyl)hydrazono)thiazolidin-5-ylidene)acetate (4k):**

Yellow solid (79 %), m.p. 242-243 °C. IR (4000-600  $\text{cm}^{-1}$ ):  $\nu_{\text{max}}$  = 3418, 3181, 3075, 2924, 1720, 1694, 1635, 1607, 1511.  $^1\text{H}$  NMR ( $\text{CDCl}_3$ , 500 MHz):  $\delta_{\text{H}}$  (ppm) 7.76 (d, 2H,  $J$  = 7.5 Hz, ArH), 7.59 (t, 1H,  $J$  = 7.5 Hz, ArH), 7.43 (t, 2H,  $J$  = 8.0 Hz, ArH), 7.21-7.25 (m, 2H, ArH), 7.15 (t, 2H,  $J$  = 8.0 Hz, ArH), 7.00 (s, 1H, CH), 6.60 (s, NH), 3.89 (s, 3H,  $\text{OCH}_3$ ).  $^{13}\text{C}$  NMR ( $\text{CDCl}_3$ , 125 MHz):  $\delta_{\text{C}}$  (ppm) 165.9 (CO), 164.0 (COO), 161.5 (d,  $J$  = 40.0 Hz, Ar), 139.2 (CH), 137.0 (Ar), 133.7 (Ar), 129.46 (d,  $J$  = 8.75 Hz, Ar), 128.8 (Ar), 128.4 (Ar), 118.2 (=C), 116.4 (d,  $J$  = 22.7 Hz, Ar), 52.9 ( $\text{OCH}_3$ ). HR-MS (ESI) for  $\text{C}_{18}\text{H}_{14}\text{N}_3\text{O}_5\text{S}_2\text{F}$   $m/z$   $[\text{M} + \text{H}]^+$  calcd.: 436.0437, found: 436.0448;  $[2\text{M} + \text{H}]^+$  calcd.: 871.0796, found: 871.0814.

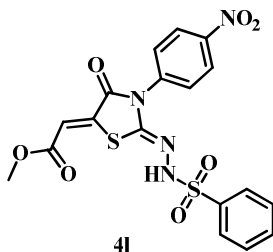**(Z)-Methyl 2-((Z)-3-(4-nitrophenyl)-4-oxo-2-(2-(phenylsulfonyl)hydrazono)thiazolidin-5-ylidene)acetate (4l):**

Yellow solid (85 %), m.p. > 250 °C. IR (4000-600  $\text{cm}^{-1}$ ):  $\nu_{\text{max}}$  = 3413, 1711, 1684, 1639, 1607, 1519, 1497.  $^1\text{H}$  NMR ( $\text{CDCl}_3$ , 500 MHz):  $\delta_{\text{H}}$  (ppm) 8.30 (d, 2H,  $J$  = 8.0 Hz, ArH), 7.78 (d, 2H,  $J$  = 8.0 Hz, ArH), 7.61 (t, 1H,  $J$  = 7.5 Hz, ArH), 7.49 (d, 2H,  $J$  = 8.5 Hz, ArH), 7.45 (t, 2H,  $J$  = 8.0 Hz, ArH), 7.03 (s, 1H, CH), 6.71 (brs, NH), 3.91 (s, 3H,  $\text{OCH}_3$ ).  $^{13}\text{C}$  NMR ( $\text{DMSO}-d_6$ , 125 MHz):  $\delta_{\text{C}}$  (ppm) 166.0 (CO), 163.2 (COO), 156.7 (C=N), 147.2 (Ar), 140.8 (CH), 139.2 (Ar), 137.5 (Ar), 133.4 (Ar), 129.5 (Ar), 128.8 (Ar), 128.0 (Ar), 124.1 (Ar), 115.7 (=C), 52.8 ( $\text{OCH}_3$ ). HR-MS (ESI) for  $\text{C}_{18}\text{H}_{14}\text{N}_4\text{O}_7\text{S}_2$   $m/z$   $[\text{M} + \text{H}]^+$  calcd.: 463.0382, found: 463.0393;  $[2\text{M} + \text{H}]^+$  calcd.: 925.0686, found: 925.0698.



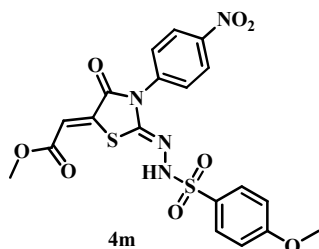

**(Z)-Methyl 2-((Z)-2-(2-((4-methoxyphenyl)sulfonyl)hydrazono)-3-(4-nitrophenyl)-4-oxothiazolidin-5-ylidene)acetate (4m):** Yellow solid (86 %), m.p. > 250 °C. IR (4000-600  $\text{cm}^{-1}$ ):  $\nu_{\text{max}}$  = 3167, 3053, 1712, 1698, 1641, 1613, 1595.  $^1\text{H}$  NMR (DMSO- $d_6$ , 500 MHz):  $\delta_{\text{H}}$  (ppm) 10.33 (brs, NH), 8.37 (d, 2H,  $J$  = 8.5 Hz, ArH), 7.65 (d, 2H,  $J$  = 9.0 Hz, ArH), 7.59 (d, 2H,  $J$  = 8.5 Hz, ArH), 7.03 (d, 2H,  $J$  = 8.5 Hz, ArH), 6.86 (s, 1H, CH), 3.83 (s, 3H, OCH<sub>3</sub>), 3.82 (s, 3H, OCH<sub>3</sub>).  $^{13}\text{C}$  NMR (DMSO- $d_6$ , 125 MHz):  $\delta_{\text{C}}$  (ppm) 166.5 (CO), 163.7 (COO), 163.4 (Ar), 147.7 (C=N), 141.4 (Ar), 139.7 (CH), 130.7 (Ar), 130.0 (Ar), 129.6 (Ar), 124.6 (Ar), 116.2 (Ar), 114.5 (=C), 56.2 (OCH<sub>3</sub>), 53.3 (OCH<sub>3</sub>). HR-MS (ESI) for C<sub>19</sub>H<sub>16</sub>N<sub>4</sub>O<sub>8</sub>S<sub>2</sub> m/z [M + H]<sup>+</sup> calcd.: 493.0488, found: 493.0503.

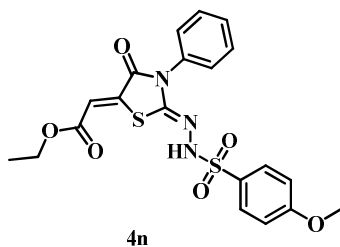

**(Z)-Ethyl 2-((Z)-2-(2-((4-methoxyphenyl)sulfonyl)hydrazono)-4-oxo-3-phenylthiazolidin-5-ylidene)acetate (4n):** Pale yellow solid (86 %), m.p. 209-210 °C. IR (4000-600  $\text{cm}^{-1}$ ):  $\nu_{\text{max}}$  = 3212, 3067, 1731, 1697, 1598, 1499.  $^1\text{H}$  NMR (CDCl<sub>3</sub>, 500 MHz):  $\delta_{\text{H}}$  (ppm) 7.67 (d, 2H,  $J$  = 9.0 Hz, ArH), 7.41-7.52 (m, 3H, ArH), 7.27 (d, 2H,  $J$  = 6.5 Hz, merge with CDCl<sub>3</sub>, ArH), 7.00 (s, 1H, CH), 6.85 (d, 2H,  $J$  = 9.0 Hz, ArH), 6.70 (brs, NH), 4.33 (q, 2H,  $J$  = 7.0 Hz, OCH<sub>2</sub>), 3.84 (s, 3H, OCH<sub>3</sub>), 1.36 (t, 3H,  $J$  = 7.0 Hz, CH<sub>3</sub>).  $^{13}\text{C}$  NMR (CDCl<sub>3</sub>, 125 MHz):  $\delta_{\text{C}}$  (ppm) 165.4 (CO), 164.2 (COO), 163.7 (Ar), 161.3 (C=N), 139.5 (CH), 133.4 (Ar), 130.8 (Ar), 129.4 (Ar), 129.3 (Ar), 128.6 (Ar), 127.6 (Ar), 118.4 (Ar), 114.0 (=C), 62.1 (OCH<sub>2</sub>), 55.7 (OCH<sub>3</sub>), 14.3 (CH<sub>3</sub>). HR-MS (ESI) for C<sub>20</sub>H<sub>19</sub>N<sub>3</sub>O<sub>6</sub>S<sub>2</sub> m/z [M + H]<sup>+</sup> calcd.: 462.0793, found: 462.0806.

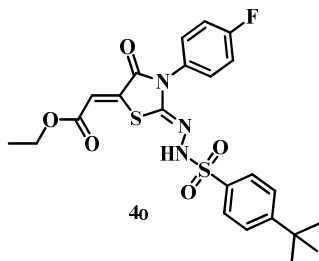

**(Z)-Ethyl 2-((Z)-2-(2-((4-tert-butylphenyl)sulfonyl)hydrazono)-3-(4-fluorophenyl)-4-oxothiazolidin-5-ylidene)acetate (4o):** Pale yellow solid (88 %), m.p. 241-242 °C. IR (4000-600  $\text{cm}^{-1}$ ):  $\nu_{\text{max}}$  = 3148, 2970, 1739,

1720, 1696, 1619, 1507.  $^1\text{H}$  NMR ( $\text{CDCl}_3$ , 500 MHz):  $\delta_{\text{H}}$  (ppm) 7.66 (d, 2H,  $J = 8.5$  Hz, ArH), 7.42 (d, 2H,  $J = 8.5$  Hz, ArH), 7.22-7.26 (m, 2H, ArH), 7.14 (t, 2H,  $J = 8.5$  Hz, ArH), 6.99 (s, 1H, CH), 6.61 (brs, NH), 4.34 (q, 2H,  $J = 7.0$  Hz,  $\text{OCH}_2$ ), 1.36 (t, 3H,  $J = 7.5$  Hz,  $\text{CH}_3$ ).  $^{13}\text{C}$  NMR ( $\text{CDCl}_3$ , 125 MHz):  $\delta_{\text{C}}$  (ppm) 165.5 (CO), 164.0 (COO), 163.6 (Ar), 161.4 ( $J = 56.25$  Hz, Ar), 157.7 (C=N), 139.1 (CH), 134.0 (Ar), 129.5 ( $J = 8.75$  Hz, Ar), 129.1 (Ar), 128.3 (Ar), 125.8 (Ar), 118.6 (=C), 116.1 ( $J = 23.75$  Hz, Ar), 62.1 ( $\text{OCH}_2$ ), 35.2 ( $\text{C}(\text{CH}_3)_3$ ), 31.0 ( $\text{CH}_3$ ), 14.2 ( $\text{CH}_3$ ). HR-MS (ESI) for  $\text{C}_{23}\text{H}_{24}\text{FN}_3\text{O}_5\text{S}_2$   $m/z$   $[\text{M} - \text{H}]^+$  calcd.: 504.1061, found: 504.1042.

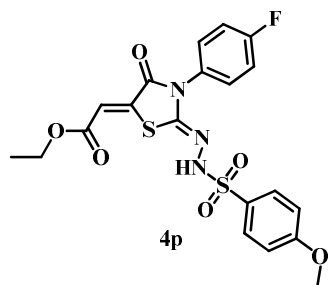

**(Z)-Ethyl 2-((Z)-3-(4-fluorophenyl)-2-(2-((4-methoxyphenyl)sulfonyl)hydrazono)-4-oxothiazolidin-5-ylidene)acetate (4p):** Yellow solid (87 %), m.p. 220-221 °C. IR (4000-600  $\text{cm}^{-1}$ ):  $\nu_{\text{max}} = 3159, 2922, 1739, 1687, 1634, 1628, 1603$ .  $^1\text{H}$  NMR ( $\text{CDCl}_3$ , 500 MHz):  $\delta_{\text{H}}$  (ppm) 7.67 (d, 2H,  $J = 8.5$  Hz, ArH), 7.22-7.30 (m, 2H, ArH), 7.16 (t, 2H,  $J = 8.5$  Hz, ArH), 6.99 (s, 1H, CH), 6.88 (d, 2H,  $J = 8.5$  Hz, ArH), 6.24 (brs, NH), 4.34 (q, 2H,  $J = 7.0$  Hz,  $\text{OCH}_2$ ), 3.86 (s, 3H,  $\text{OCH}_3$ ), 1.36 (t, 2H,  $J = 7.0$  Hz,  $\text{CH}_3$ ).  $^{13}\text{C}$  NMR ( $\text{CDCl}_3$ , 125 MHz):  $\delta_{\text{C}}$  (ppm) 165.5 (CO), 163.9 ( $J = 33.75$  Hz, Ar), 163.6 (COO), 161.6 (C=N), 160.8 (Ar), 139.1 (CH), 130.6 (Ar), 129.5 ( $J = 8.75$  Hz, Ar), 118.6 (Ar), 116.2 ( $J = 22.5$  Hz, Ar), 116.1 (Ar), 114.0 (=C), 62.1 ( $\text{OCH}_2$ ), 55.7 ( $\text{OCH}_3$ ), 14.2 ( $\text{CH}_3$ ). HR-MS (ESI) for  $\text{C}_{20}\text{H}_{18}\text{FN}_3\text{O}_6\text{S}_2$   $m/z$   $[\text{M} - \text{H}]^+$  calcd.: 478.0541, found: 478.0552.

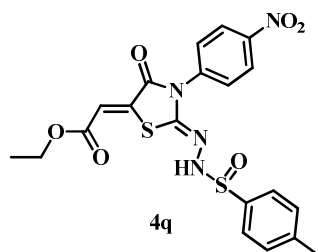

**(Z)-Ethyl 2-((Z)-3-(4-nitrophenyl)-4-oxo-2-(2-(p-tolylsulfinyl)hydrazono)thiazolidin-5-ylidene)acetate (4q):** Pale yellow solid (86 %), m.p. 210-211 °C. IR (4000-600  $\text{cm}^{-1}$ ):  $\nu_{\text{max}} = 3306, 3238, 3147, 1710, 1689, 1639, 1611, 1596, 1553$ .  $^1\text{H}$  NMR ( $\text{CDCl}_3$ , 500 MHz):  $\delta_{\text{H}}$  (ppm) 8.31 (d, 2H,  $J = 8.5$  Hz, ArH), 7.65 (d, 2H,  $J = 8.0$  Hz, ArH), 7.51 (d, 2H,  $J = 8.5$  Hz, ArH), 7.22-7.29 (m, 2H, merge with  $\text{CDCl}_3$ , ArH), 7.01 (s, 1H, CH), 6.72 (brs, NH), 4.35 (q, 2H,  $J = 6.5$  Hz,  $\text{OCH}_2$ ), 2.42 (s, 3H,  $\text{CH}_3$ ), 1.37 (t, 3H,  $J = 7.0$  Hz,  $\text{CH}_3$ ).  $^{13}\text{C}$  NMR ( $\text{DMSO}-d_6$ , 125 MHz):  $\delta_{\text{C}}$  (ppm) 165.5 (CO), 163.2 (COO), 145.3 (C=N), 144.1 (CH), 129.7 (Ar), 129.5 (Ar), 129.3 (Ar), 128.1 (Ar), 128.0 (Ar), 124.1 (Ar), 123.6 (Ar), 116.1 (=C), 61.8 ( $\text{OCH}_2$ ), 21.1 ( $\text{CH}_3$ ), 14.1 ( $\text{CH}_3$ ). HR-MS (ESI) for  $\text{C}_{20}\text{H}_{18}\text{N}_4\text{O}_7\text{S}_2$   $m/z$   $[\text{M} + \text{H}]^+$  calcd.: 491.0695, found: 491.0695.

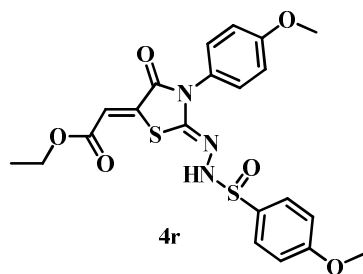

**(Z)-Ethyl 2-((Z)-3-(4-methoxyphenyl)-2-((4-methoxyphenyl)sulfinyl)hydrazono)-4-oxothiazolidin-5-ylidene)acetate (4r):** Pale yellow solid (88 %), m.p. 178-179 °C. IR (4000-600  $\text{cm}^{-1}$ ):  $\nu_{\text{max}}$  = 3138, 3065, 2953, 1705, 1642, 1614, 1527, 1495.  $^1\text{H}$  NMR ( $\text{CDCl}_3$ , 500 MHz):  $\delta_{\text{H}}$  (ppm) 7.68 (d, 2H,  $J$  = 8.5 Hz, ArH), 7.17 (d, 2H,  $J$  = 8.5 Hz, ArH), 6.94-7.00 (m, 2H, ArH), 6.86 (d, 2H,  $J$  = 9.0 Hz, ArH), 6.56 (s, 1H, CH), 4.33 (q, 2H,  $J$  = 7.0 Hz,  $\text{OCH}_2$ ), 3.82-3.87 (m, 6H,  $\text{OCH}_3$ ,  $\text{OCH}_3$ ), 1.36 (t, 3H,  $J$  = 7.0 Hz,  $\text{CH}_3$ ).  $^{13}\text{C}$  NMR ( $\text{CDCl}_3$ , 125 MHz):  $\delta_{\text{C}}$  (ppm) 165.6 (CO), 164.3 (COO), 163.7 (Ar), 161.7 (Ar), 160.0 (C=N), 139.4 (CH), 130.7 (Ar), 128.7 (Ar), 125.8 (Ar), 118.3 (Ar), 114.4 (Ar), 113.9 (=C), 62.0 ( $\text{OCH}_2$ ), 55.6 ( $\text{OCH}_3$ ), 55.6 ( $\text{OCH}_3$ ), 14.2 ( $\text{CH}_3$ ). HR-MS (ESI) for  $\text{C}_{21}\text{H}_{21}\text{N}_3\text{O}_7\text{S}_2$   $m/z$   $[\text{M} + \text{H}]^+$  calcd.: 492.0899, found: 492.0891.

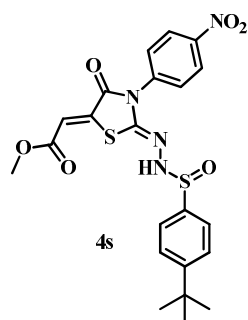

**(Z)-Methyl 2-((Z)-2-((4-(tert-butyl)phenyl)sulfinyl)hydrazono)-3-(4-nitrophenyl)-4-oxothiazolidin-5-ylidene)acetate (4s):** Cream color solid (86 %), m.p. 220-221 °C. IR (4000-600  $\text{cm}^{-1}$ ):  $\nu_{\text{max}}$  = 3193, 1730, 1692, 1604, 1511, 1388.  $^1\text{H}$  NMR ( $\text{CDCl}_3$ , 500 MHz):  $\delta_{\text{H}}$  (ppm) 8.30 (d, 2H,  $J$  = 9.0 Hz, ArH), 7.68 (d, 2H,  $J$  = 8.5 Hz, ArH), 7.50 (d, 2H,  $J$  = 9.0 Hz, ArH), 7.45 (d, 2H,  $J$  = 8.5 Hz, ArH), 7.03 (s, 1H, CH), 6.66 (brs, NH), 3.90 (s, 3H,  $\text{OCH}_3$ ), 1.32 (s, 9H,  $\text{C}(\text{CH}_3)_3$ ).  $^{13}\text{C}$  NMR ( $\text{CDCl}_3$ , 125 MHz):  $\delta_{\text{C}}$  (ppm) 165.8 (CO), 163.4 (COO), 159.3 (Ar), 158.1 (Ar), 147.7 (C=N), 138.9 (CH), 138.6 (Ar), 134.2 (Ar), 128.6 (Ar), 128.3 (Ar), 125.9 (Ar), 124.2, 118.7 (=C), 52.9 ( $\text{OCH}_3$ ), 35.3 ( $\text{C}(\text{CH}_3)_3$ ), 31.0 ( $\text{CH}_3$ ). HR-MS (ESI) for  $\text{C}_{22}\text{H}_{22}\text{N}_4\text{O}_7\text{S}_2$   $m/z$   $[\text{M} + \text{H}]^+$  calcd.: 519.1008, found: 519.0000.

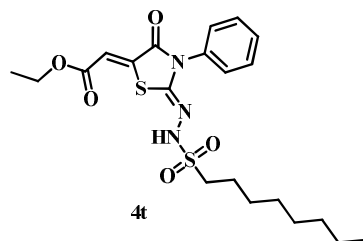

**(Z)-Ethyl 2-((Z)-2-(2-(octylsulfonyl)hydrazono)-4-oxo-3-phenylthiazolidin-5-ylidene)acetate (4t):** Pale yellow solid (87 %), m.p. 164-165 °C. IR (4000-600  $\text{cm}^{-1}$ ):  $\nu_{\text{max}}$  = 3156, 2920, 2852, 1739, 1715, 1685, 1628, 1602.  $^1\text{H}$  NMR ( $\text{CDCl}_3$ , 500 MHz):  $\delta_{\text{H}}$  (ppm) 7.51 (t, 2H,  $J$  = 6.0 Hz, ArH), 7.46 (t, 1H,  $J$  = 6.5 Hz, ArH), 7.33 (d, 2H,  $J$  = 7.5 Hz, ArH), 7.00 (s, 1H, CH), 6.55 (brs, NH), 4.34 (q, 2H,  $J$  = 7.0 Hz,  $\text{OCH}_2$ ), 3.04-3.09 (m, 2H,  $\text{CH}_2$ ), 1.70-1.78 (m, 2H,  $\text{CH}_2$ ), 1.36 (t, 3H,  $J$  = 8.0 Hz,  $\text{CH}_3$ ), 1.20-1.30 (m, 10 H,  $(\text{CH}_2)_5$ ), 0.87 (t, 3H,  $J$  = 6.5 Hz,  $\text{CH}_3$ ).  $^{13}\text{C}$  NMR ( $\text{CDCl}_3$ , 125 MHz):  $\delta_{\text{C}}$  (ppm). 165.5 (CO), 164.3 (COO), 163.5 (C=N), 139.2 (=CH), 133.3 (Ar), 129.4 (Ar), 129.4 (Ar), 127.4 (Ar), 118.6 (=C), 62.1 ( $\text{OCH}_2$ ), 50.1 ( $\text{CH}_2$ ), 31.7 ( $\text{CH}_2$ ), 30.9 ( $\text{CH}_2$ ), 28.9 ( $\text{CH}_2$ ), 28.8 ( $\text{CH}_2$ ), 28.2 ( $\text{CH}_2$ ), 23.1 ( $\text{CH}_2$ ), 22.6 ( $\text{CH}_2$ ), 14.2 ( $\text{CH}_3$ ), 14.0 ( $\text{CH}_3$ ). HR-MS (ESI) for  $\text{C}_{21}\text{H}_{29}\text{N}_3\text{O}_5\text{S}_2$   $m/z$  [ $\text{M} - \text{H}$ ] $^+$  calcd.: 466.1497, found: 466.1469.

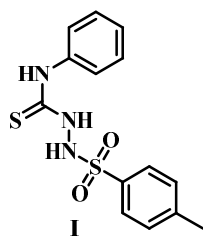

**N-Phenyl-2-tosylhydrazinecarbothioamide (Intermediate I):** White solid,  $^1\text{H}$  NMR ( $\text{DMSO-d}_6$ , 500 MHz):  $\delta_{\text{H}}$  (ppm) 10.03 (brs, NH), 9.81 (brs, NH), 9.68 (brs, NH), 7.82 (d, 2H,  $J$  = 8.5 Hz, ArH), 7.48 (d, 2H,  $J$  = 8.5 Hz, ArH), 7.32-7.40 (m, 4H, ArH), 7.20 (t, 1H,  $J$  = 7.5 Hz, ArH), 2.45 (s, 3H,  $\text{CH}_3$ ).

#### 4. Copies of $^1\text{H}$ & $^{13}\text{C}$ NMR spectra of the Products:

##### (Z)-Methyl 2-((Z)-4-oxo-3-phenyl-2-(2-tosylhydrazone)thiazolidin-5-ylidene)acetate (4a):

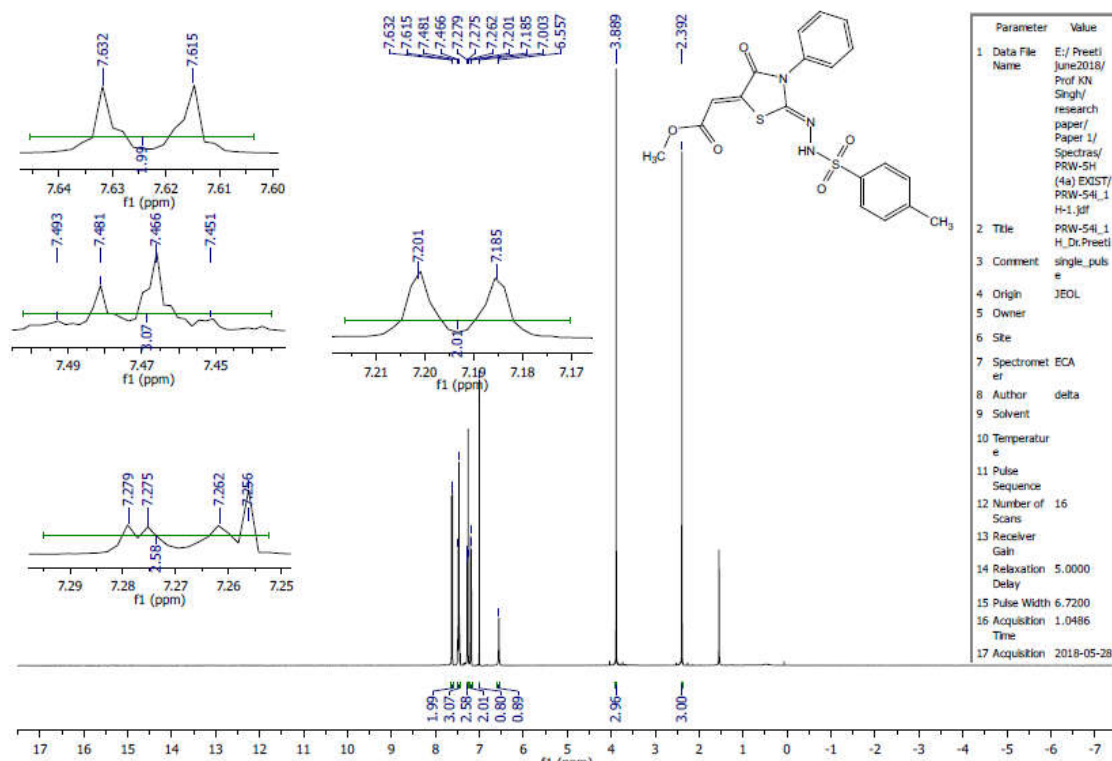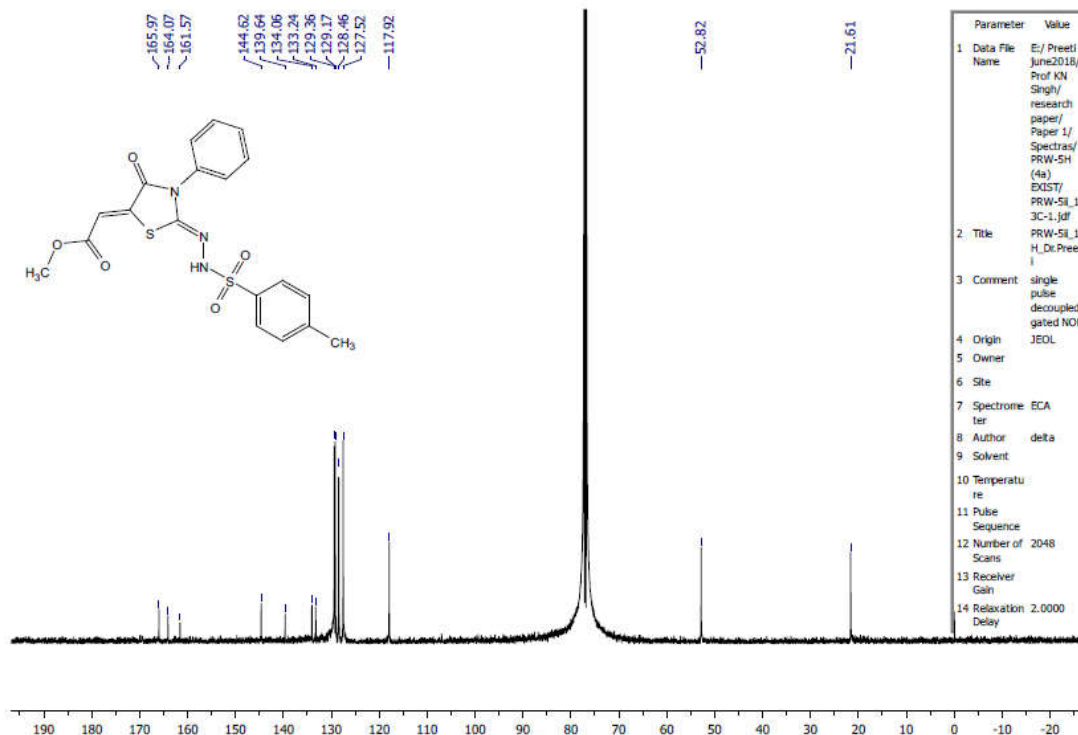

**(Z)-Ethyl 2-((Z)-3-(4-nitrophenyl)-4-oxo-2-(2-(phenylsulfonyl)hydrazono)thiazolidin-5-ylidene)acetate****(4b):**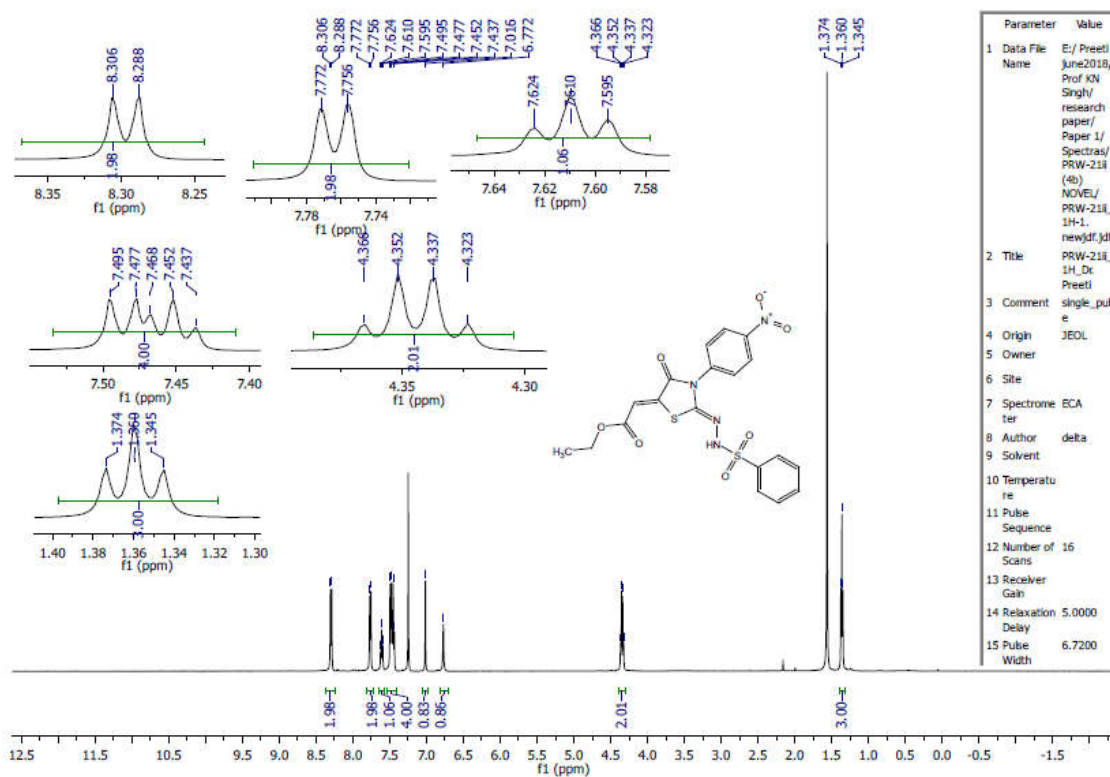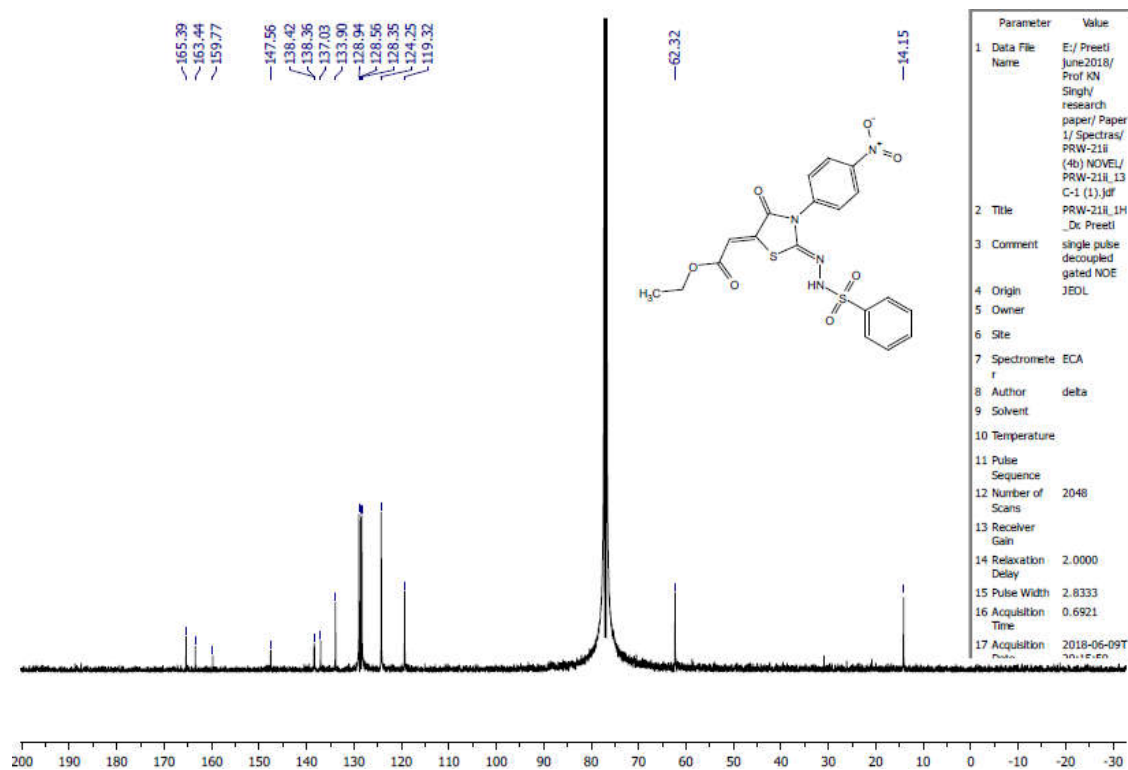



**(Z)-Ethyl 2-((Z)-2-(2-((4-methoxyphenyl)sulfonyl)hydrazono)-3-(4-nitrophenyl)-4-oxothiazolidin-5-ylidene)acetate (4d):**

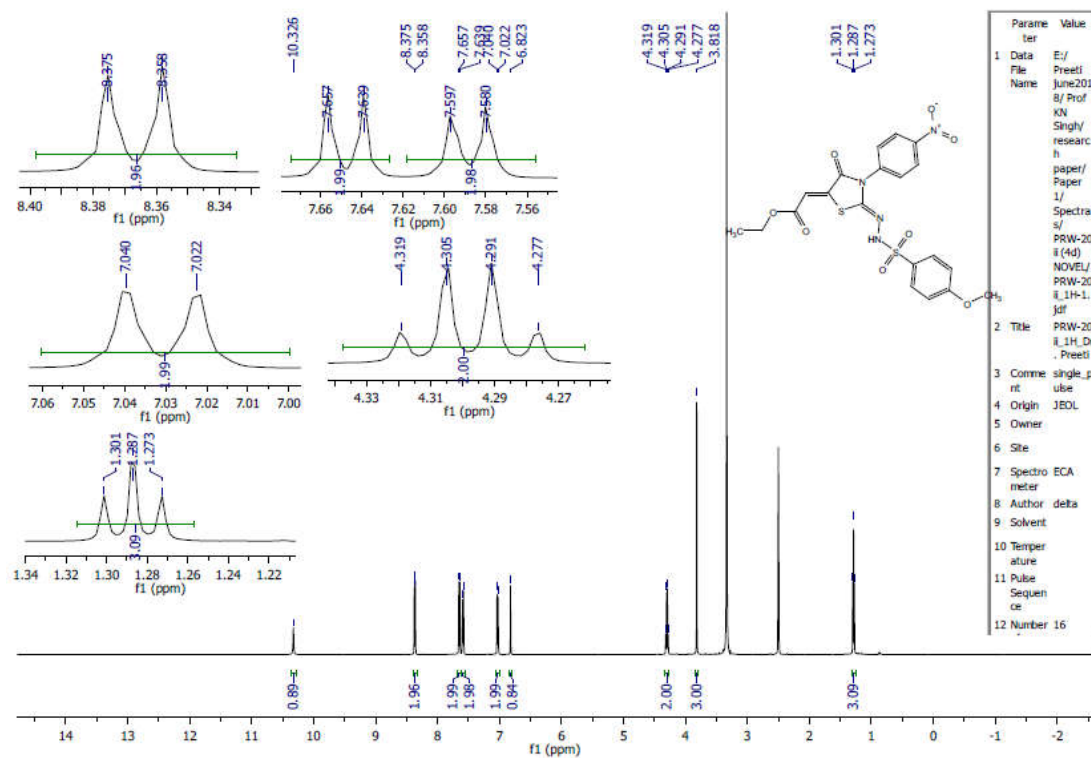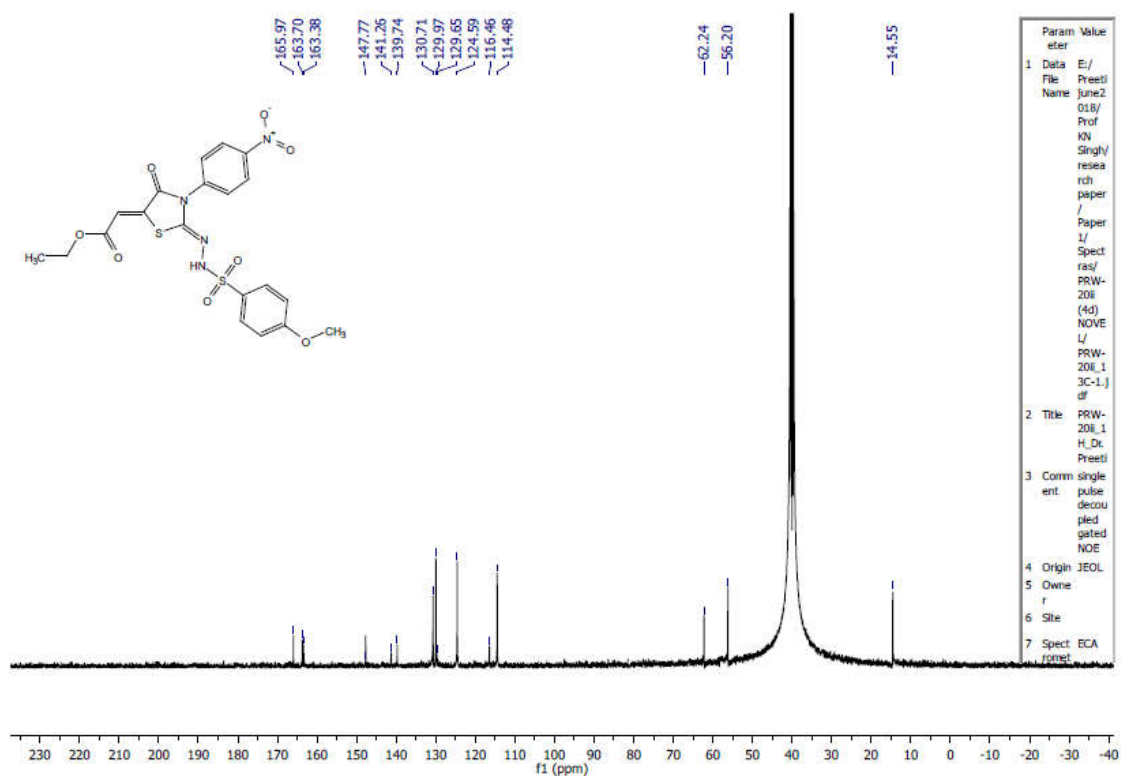



(Z)-Ethyl 2-((Z)-2-(2-((4-(tert-butyl)phenyl)sulfonyl)hydrazono)-3-(4-nitrophenyl)-4-oxothiazolidin-5-ylidene)acetate (4e):

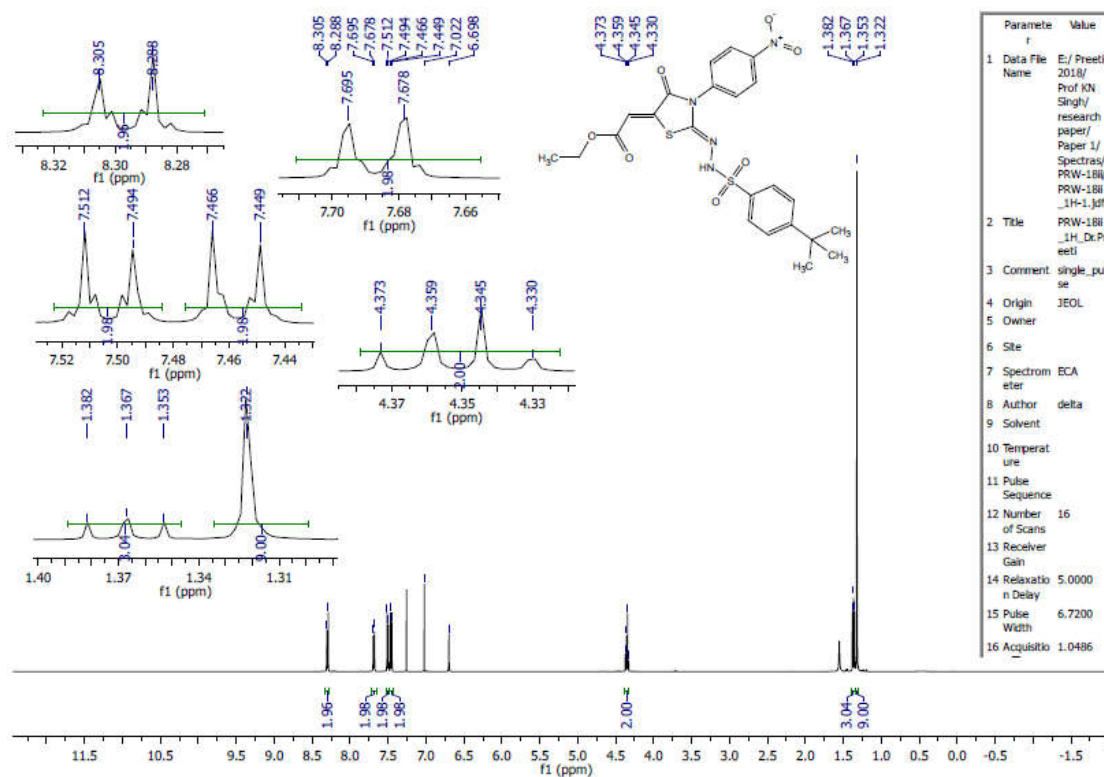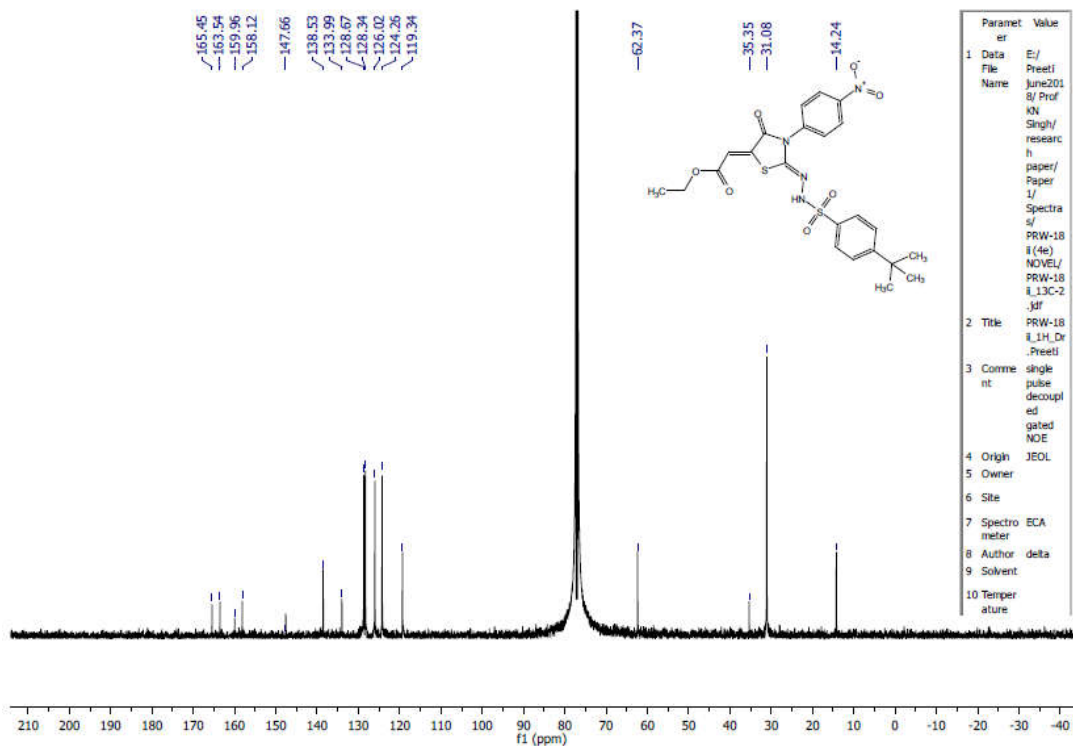

**(Z)-Ethyl 2-((Z)-2-(2-((4-nitrophenyl)sulfonyl)hydrazono)-4-oxo-3-phenylthiazolidin-5-ylidene)acetate****(4f):**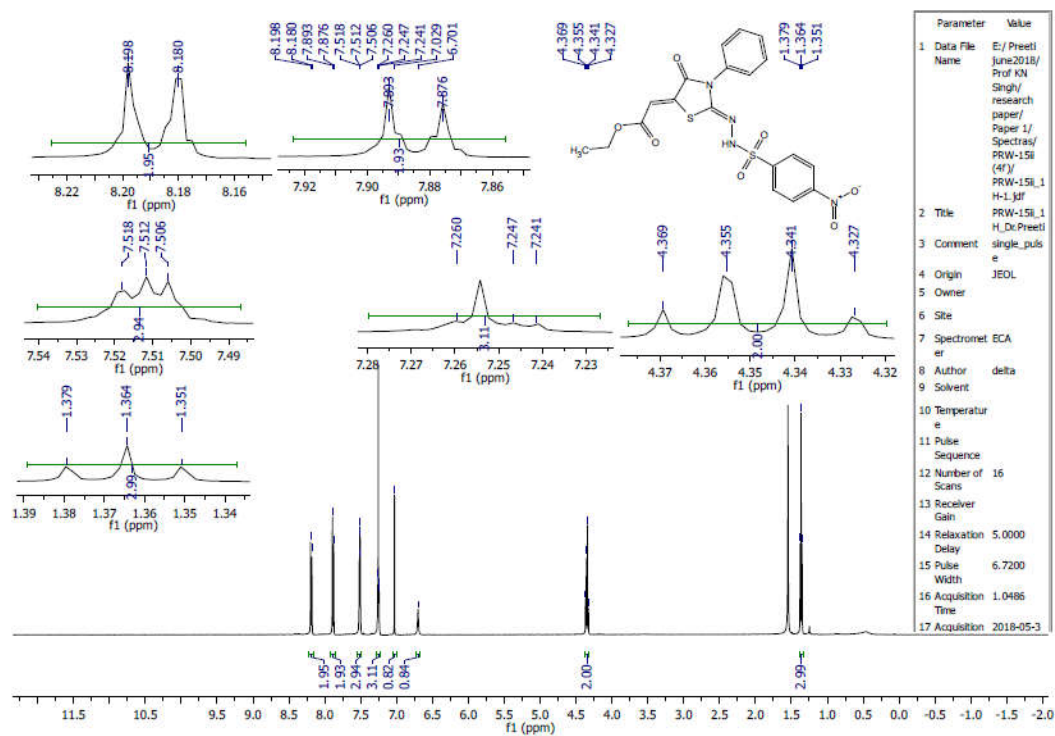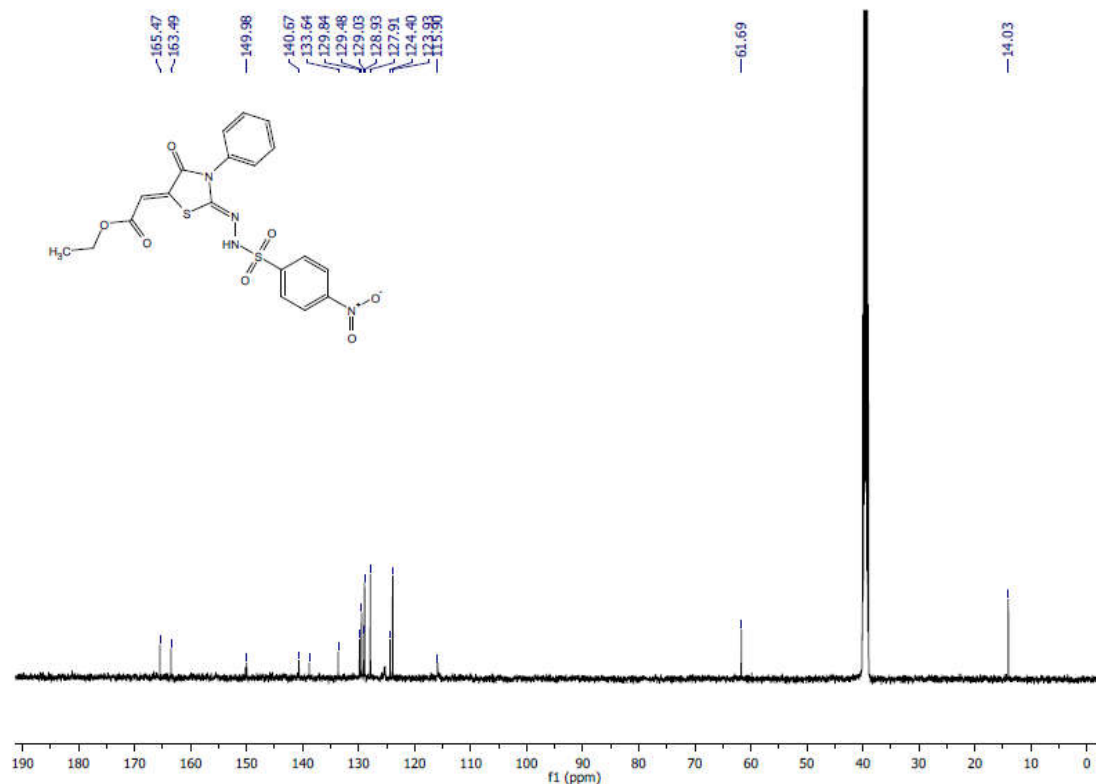

**(Z)-Methyl 2-((Z)-4-oxo-3-phenyl-2-(2-(phenylsulfonyl)hydrazono)thiazolidin-5-ylidene)acetate (4g):**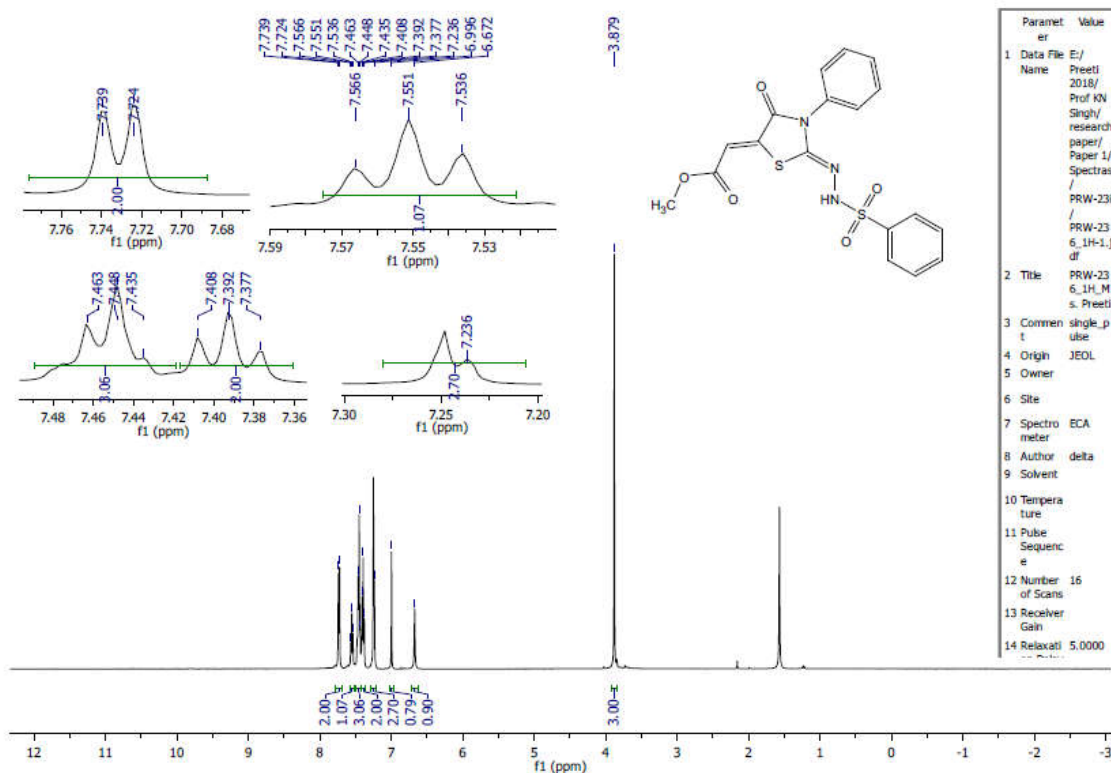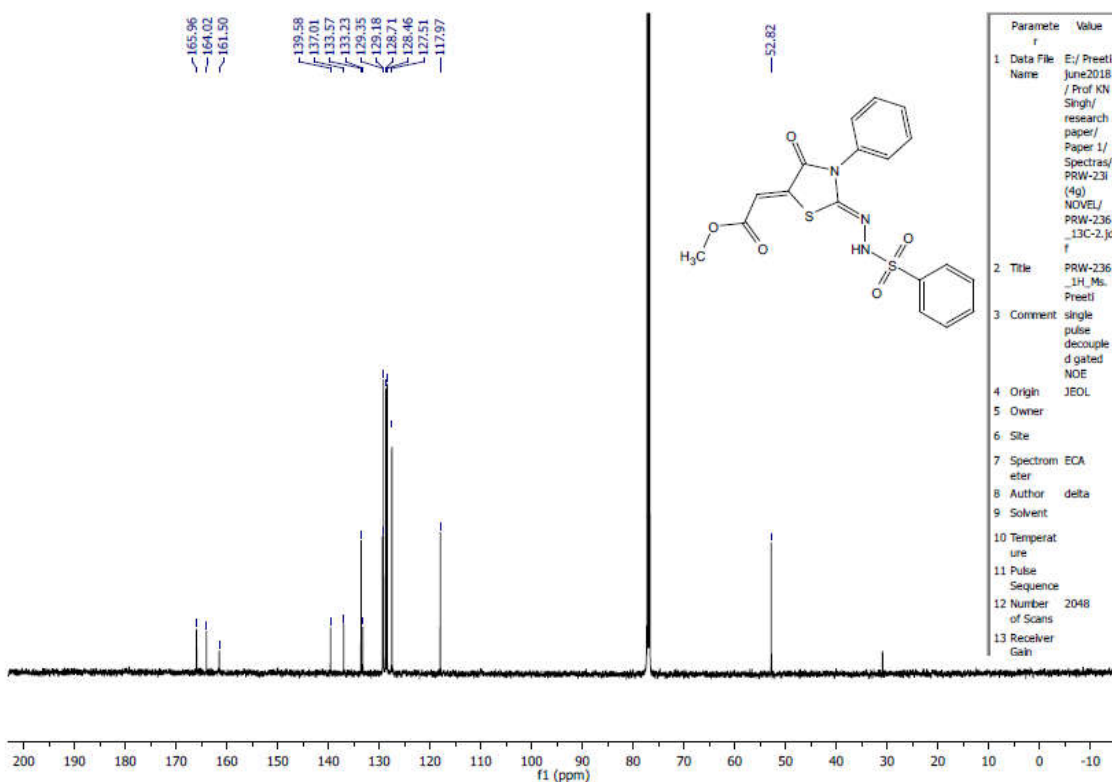

**(Z)-Methyl 2-((Z)-3-(4-nitrophenyl)-2-(2-(octylsulfonyl)hydrazone)-4-oxothiazolidin-5-ylidene)acetate****(4h):**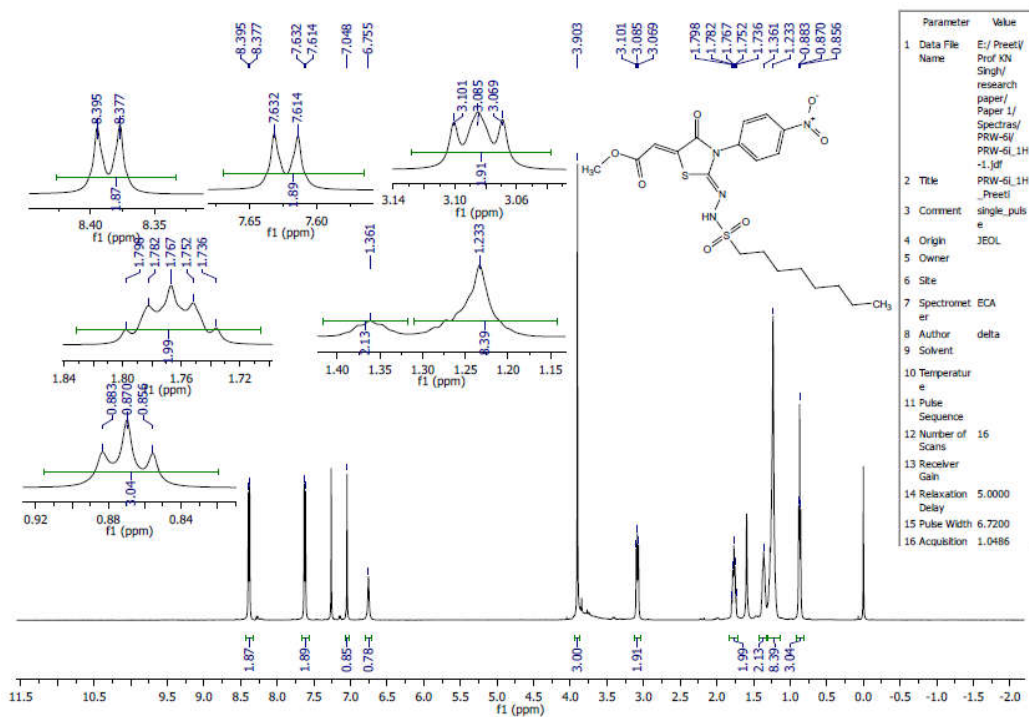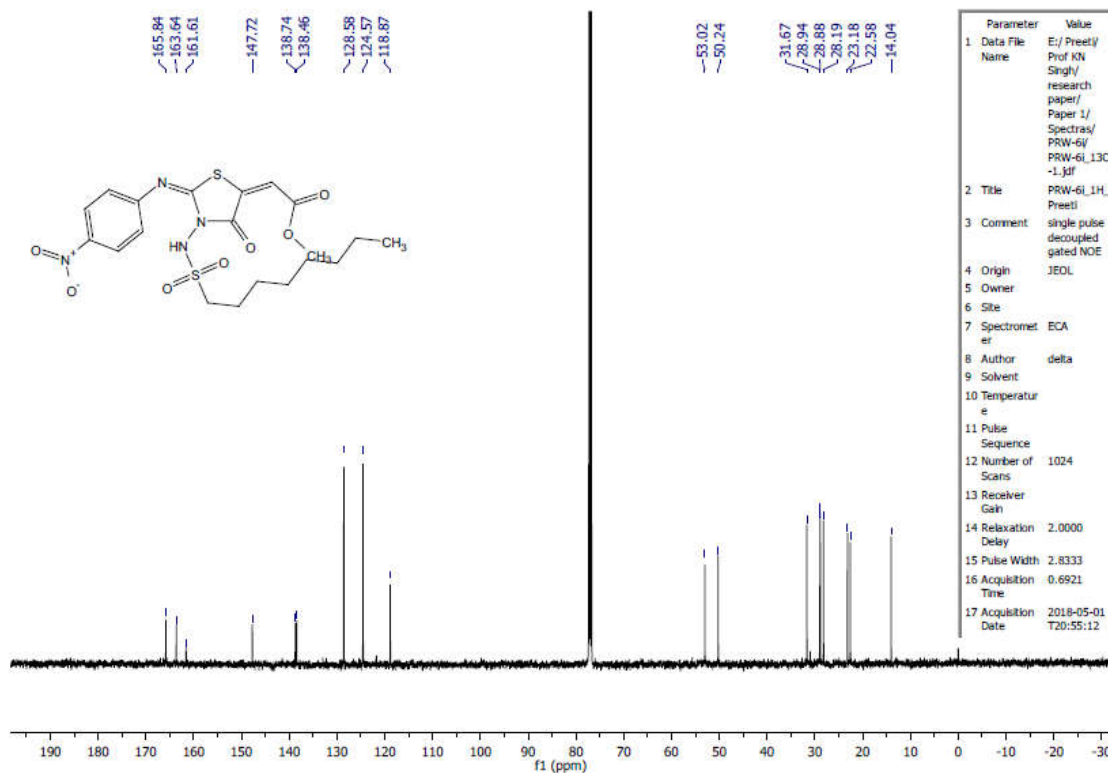

**(Z)-Methyl 2-((Z)-2-((4-(tert-butyl)phenyl)sulfonyl)hydrazono)-3-(4-methoxyphenyl)-4-oxothiazolidin-5-ylidene)acetate (4i):**

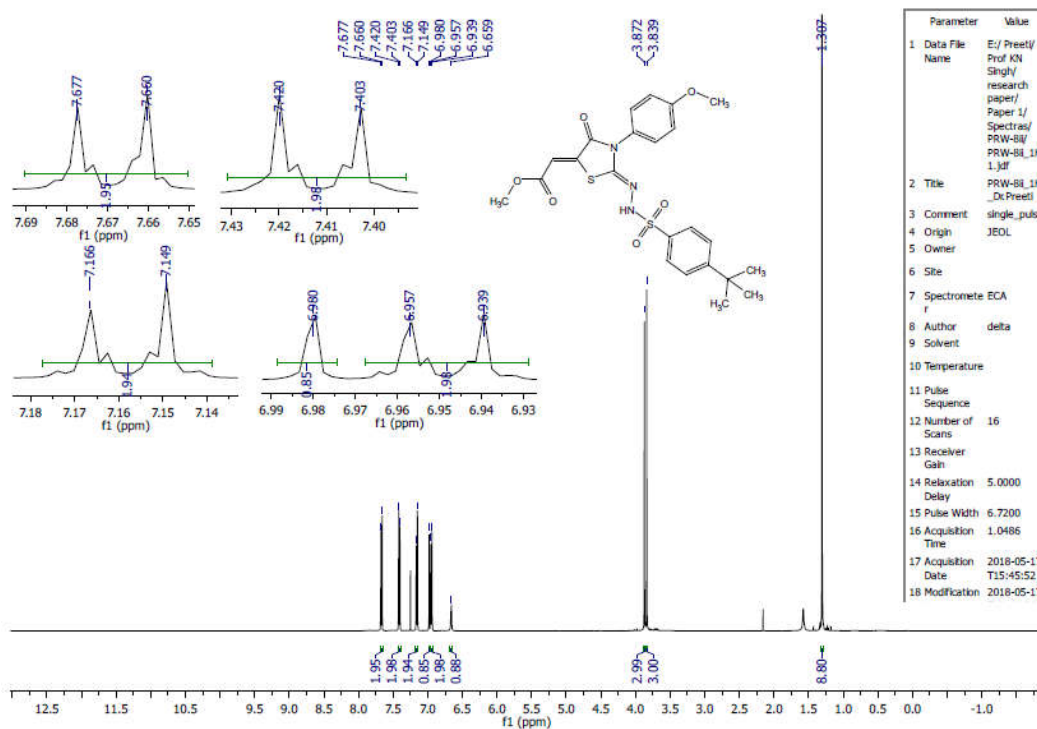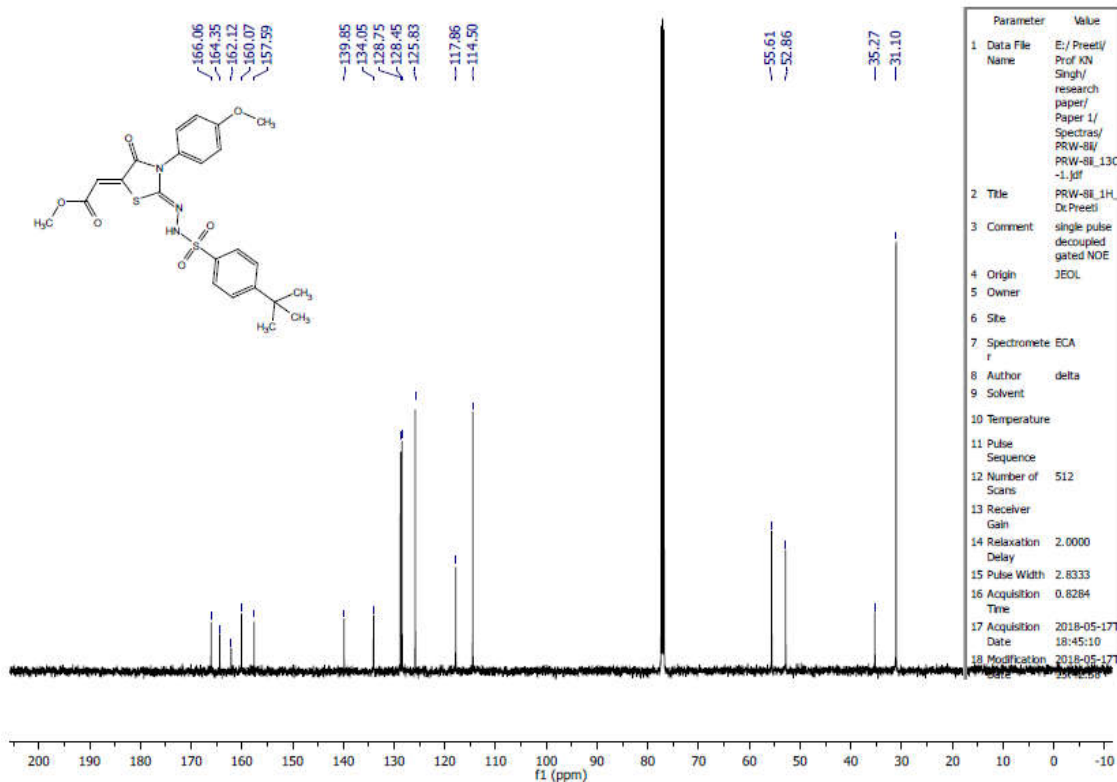

**(Z)-Ethyl 2-((Z)-3-(4-nitrophenyl)-2-(2-(octylsulfonyl)hydrazono)-4-oxothiazolidin-5-ylidene)acetate (4j):**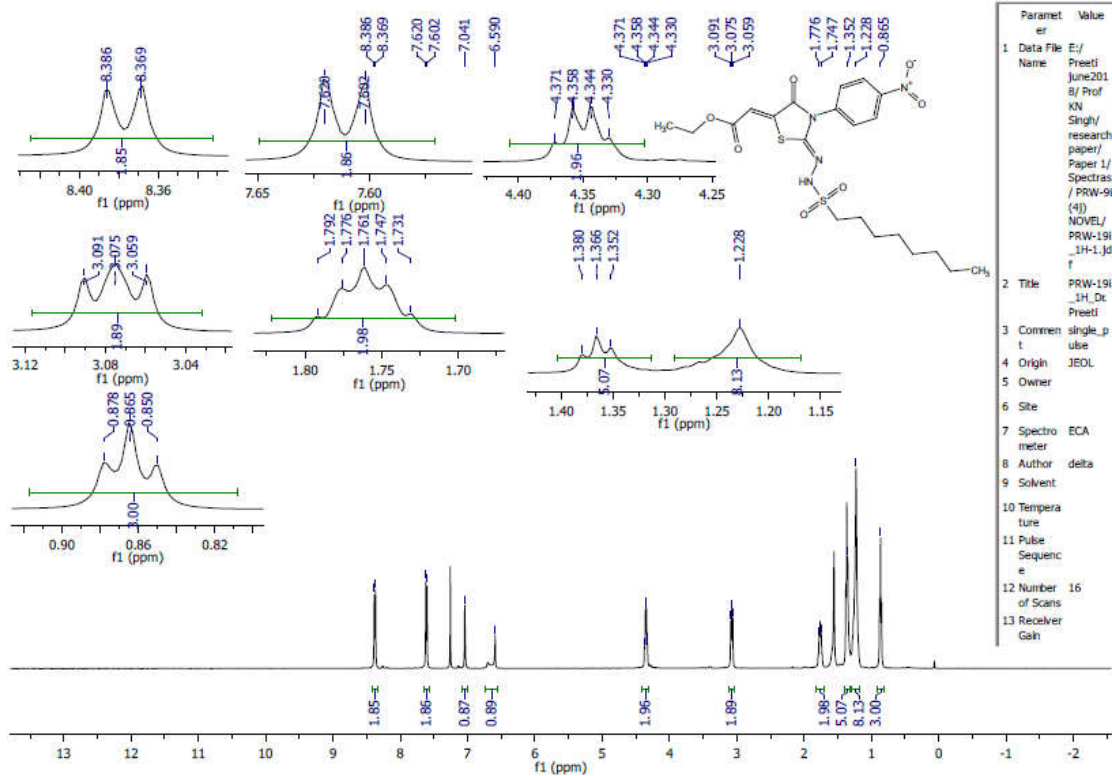

| Parameter          | Value                                                                                                  |
|--------------------|--------------------------------------------------------------------------------------------------------|
| 1 Data File Name   | E:/Preeti June2018/Prof KN Singh/research paper/ Paper 1/ Spectras/ PRW-91 (4j) NOVEL/ PRW-191_1H-1.jd |
| 2 Title            | PRW-191_1H_1.Dt                                                                                        |
| 3 Comment          | single pulse                                                                                           |
| 4 Origin           | JEOL                                                                                                   |
| 5 Owner            |                                                                                                        |
| 6 Site             |                                                                                                        |
| 7 Spectrometer     | ECA                                                                                                    |
| 8 Author           | delta                                                                                                  |
| 9 Solvent          |                                                                                                        |
| 10 Temperature     |                                                                                                        |
| 11 Pulse Sequence  |                                                                                                        |
| 12 Number of Scans | 16                                                                                                     |
| 13 Receiver Gain   |                                                                                                        |

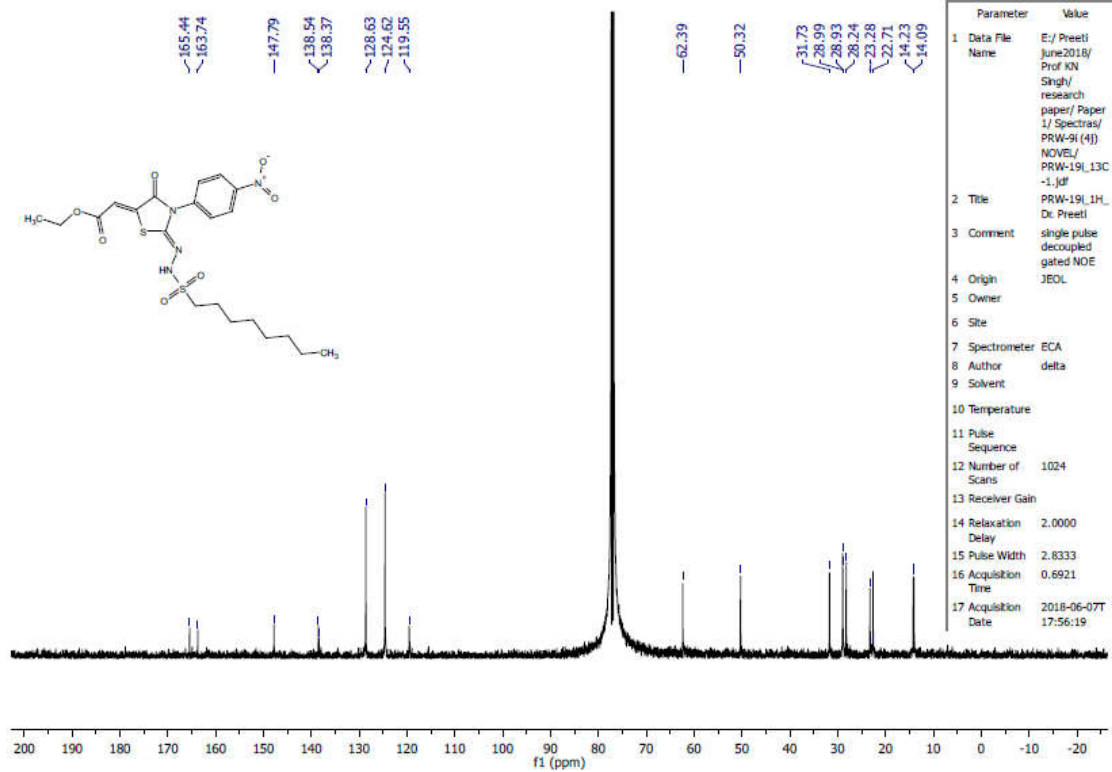

| Parameter           | Value                                                                                                   |
|---------------------|---------------------------------------------------------------------------------------------------------|
| 1 Data File Name    | E:/Preeti June2018/Prof KN Singh/research paper/ Paper 1/ Spectras/ PRW-91 (4j) NOVEL/ PRW-191_13C-1.jd |
| 2 Title             | PRW-191_1H_1.Dt                                                                                         |
| 3 Comment           | single pulse decoupled gated NOE                                                                        |
| 4 Origin            | JEOL                                                                                                    |
| 5 Owner             |                                                                                                         |
| 6 Site              |                                                                                                         |
| 7 Spectrometer      | ECA                                                                                                     |
| 8 Author            | delta                                                                                                   |
| 9 Solvent           |                                                                                                         |
| 10 Temperature      |                                                                                                         |
| 11 Pulse Sequence   |                                                                                                         |
| 12 Number of Scans  | 1024                                                                                                    |
| 13 Receiver Gain    |                                                                                                         |
| 14 Relaxation Delay | 2.0000                                                                                                  |
| 15 Pulse Width      | 2.8333                                                                                                  |
| 16 Acquisition Time | 0.6921                                                                                                  |
| 17 Acquisition Date | 2018-06-07T 17:56:19                                                                                    |

**(Z)-Methyl 2-((Z)-3-(4-fluorophenyl)-4-oxo-2-(2-(phenylsulfonyl)hydrazono)thiazolidin-5-ylidene)acetate****(4k):**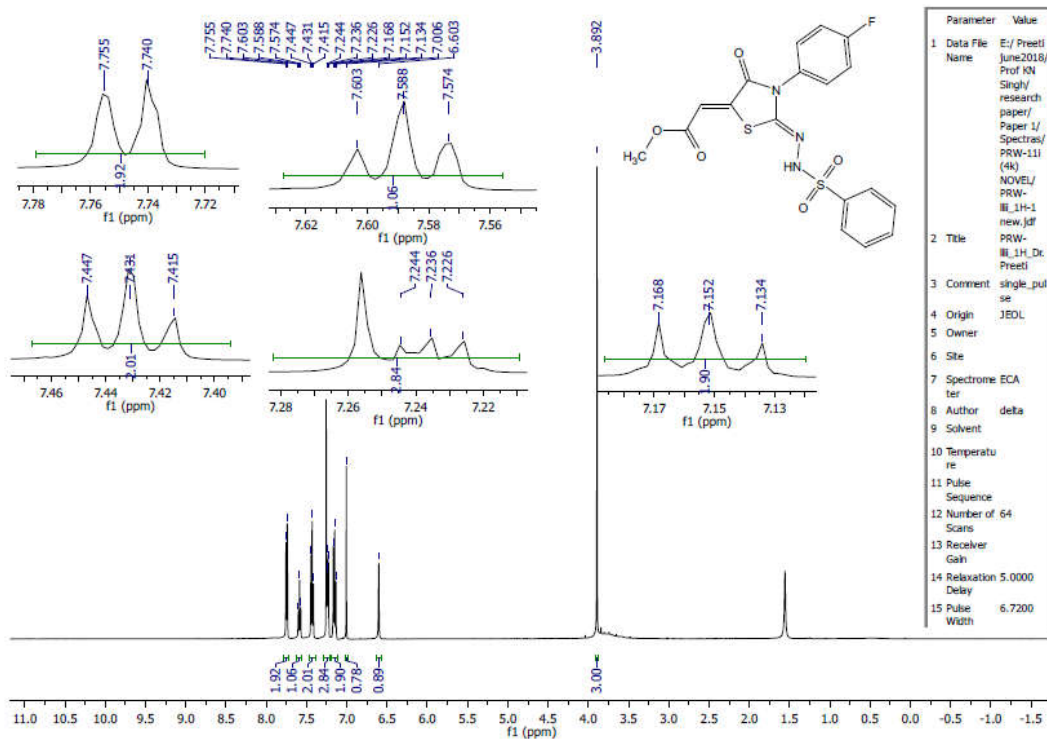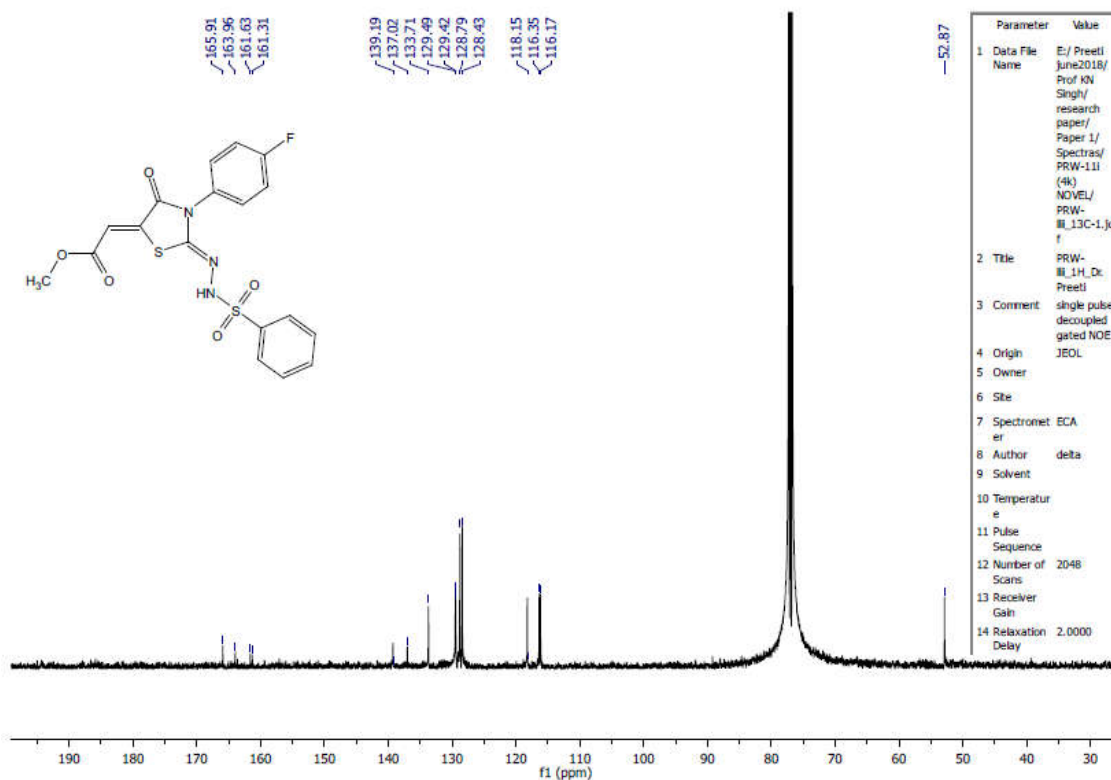

(Z)-Methyl 2-((Z)-3-(4-nitrophenyl)-4-oxo-2-(2-(phenylsulfonyl)hydrazono)thiazolidin-5-ylidene)acetate

(4l):

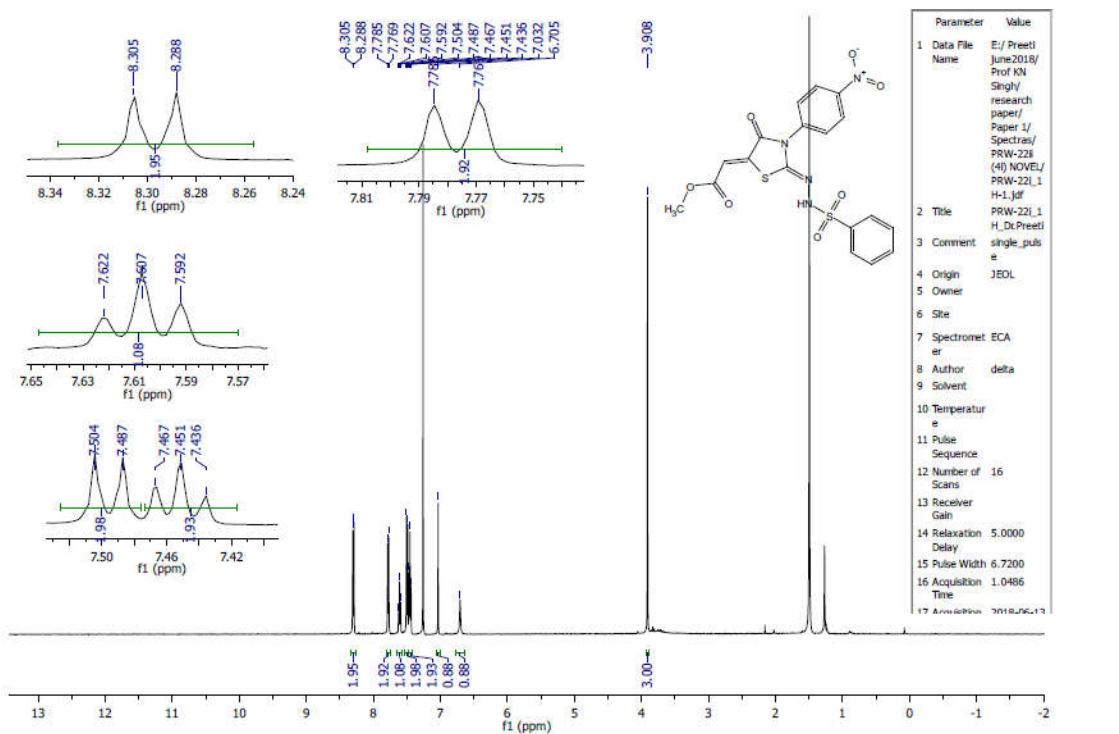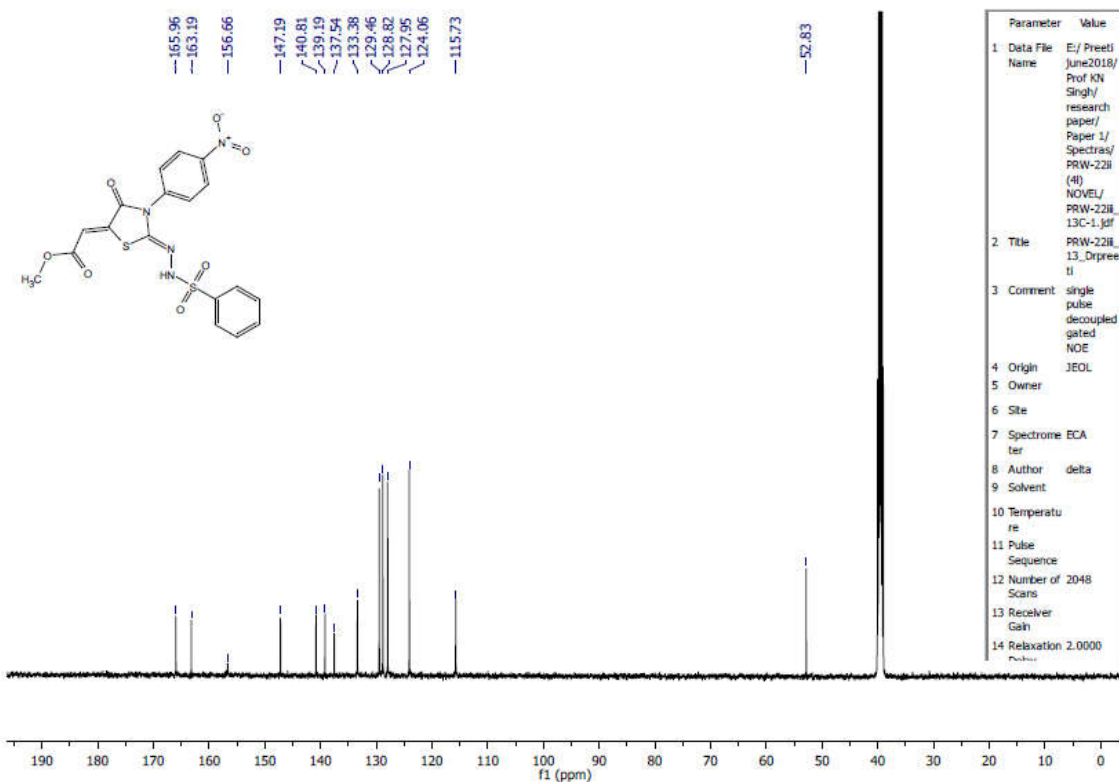



**(Z)-Methyl 2-((Z)-2-((4-methoxyphenyl)sulfonyl)hydrazono)-3-(4-nitrophenyl)-4-oxothiazolidin-5-ylidene)acetate (4m):**

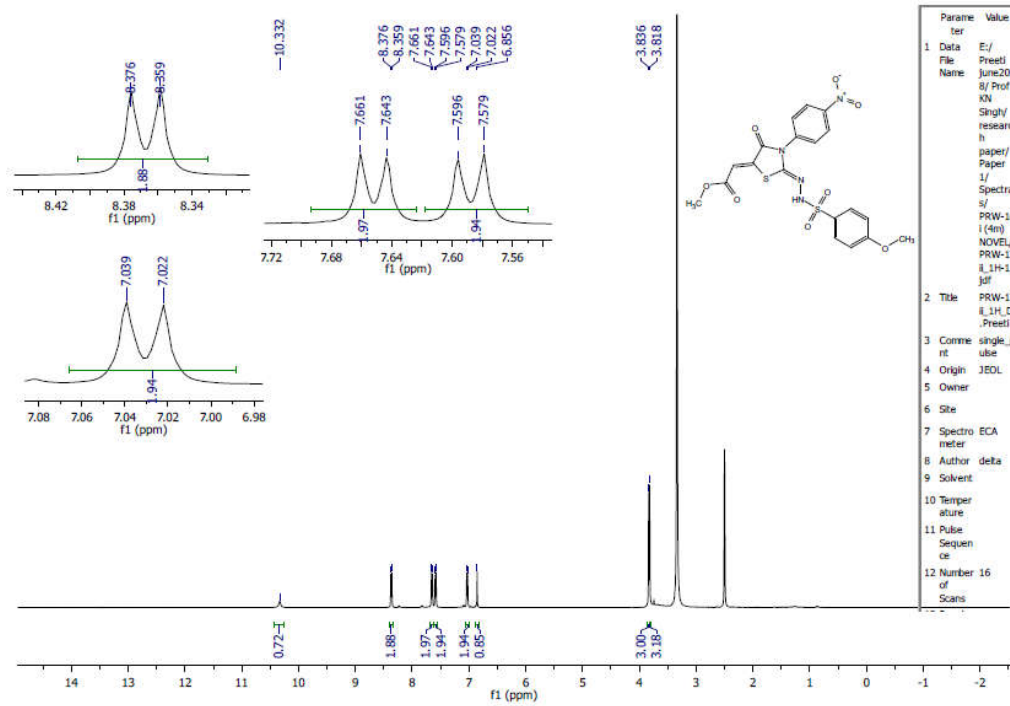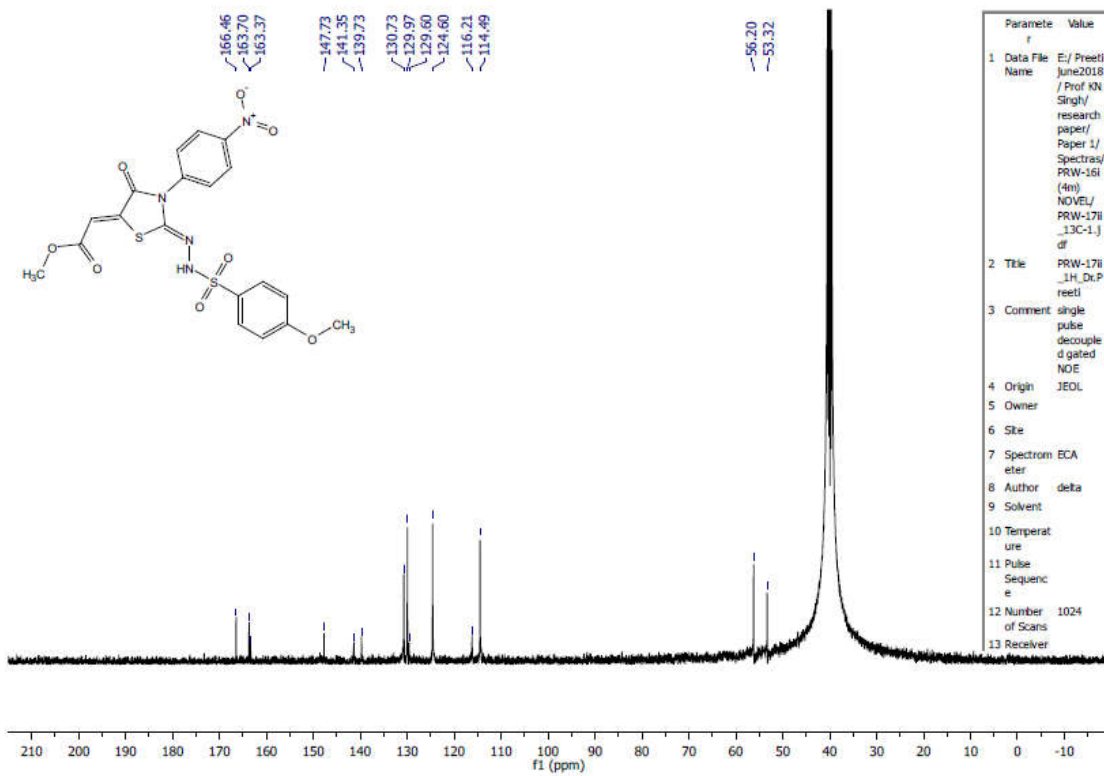

**(Z)-Ethyl 2-((Z)-2-(2-((4-methoxyphenyl)sulfonyl)hydrazono)-4-oxo-3-phenylthiazolidin-5-ylidene)acetate****(4n):**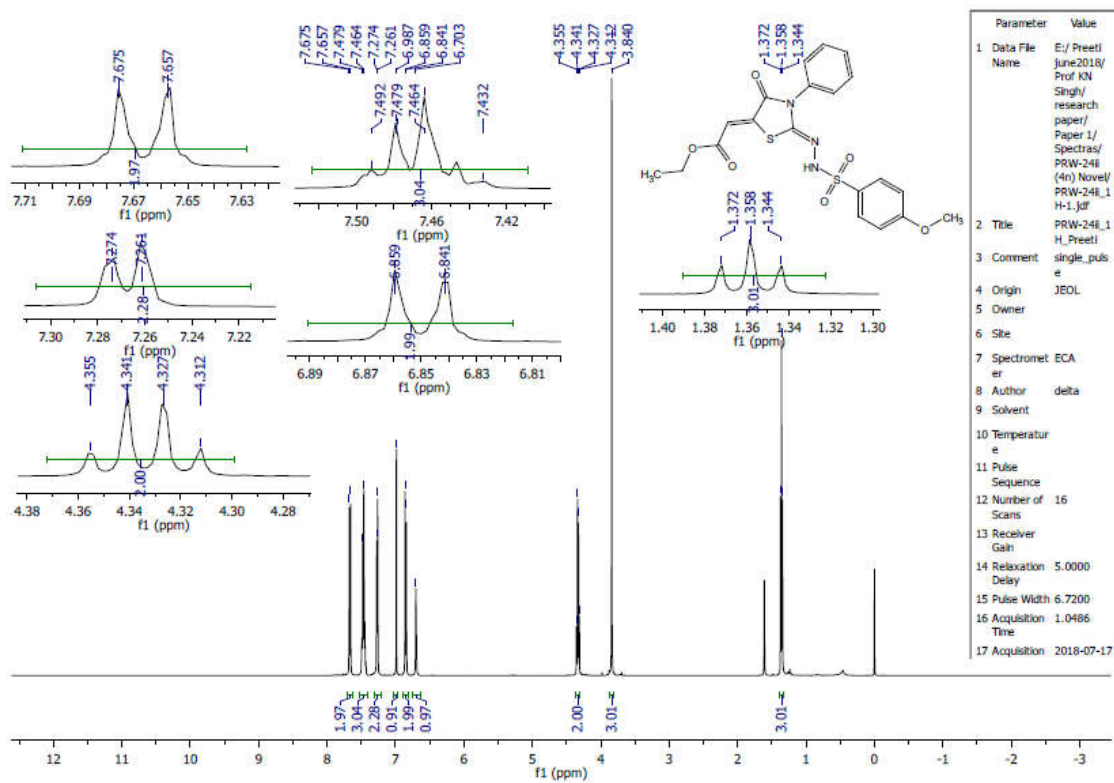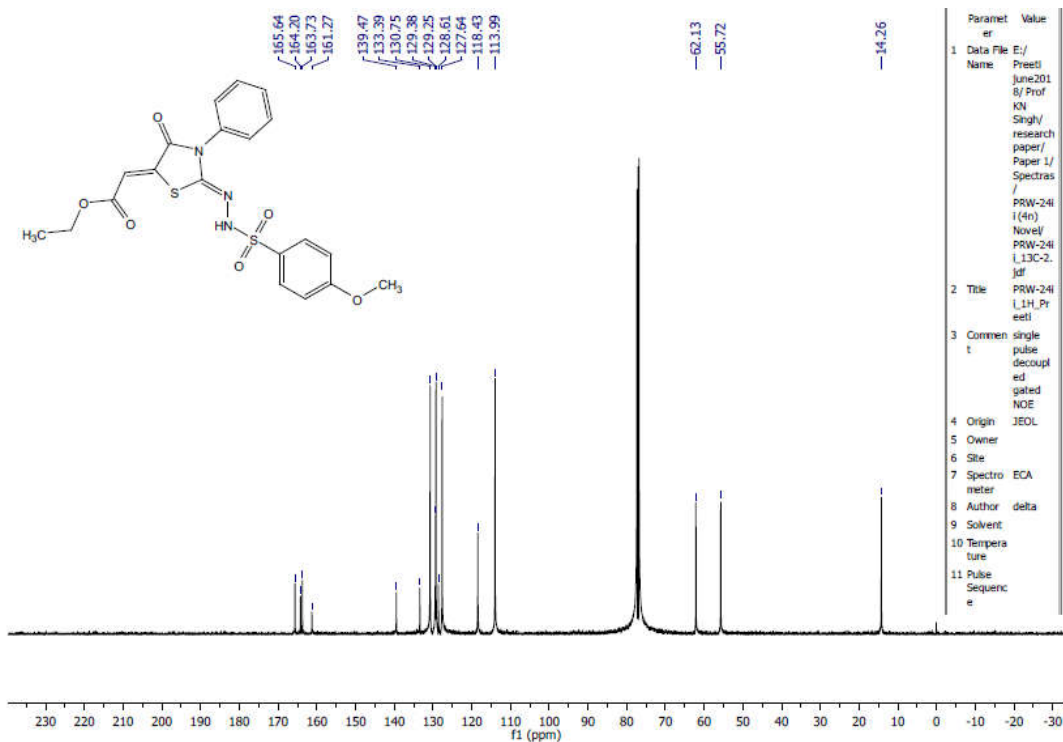

(Z)-Ethyl 2-((Z)-2-(2-((4-(tert-butyl)phenyl)sulfonyl)hydrazono)-3-(4-fluorophenyl)-4-oxothiazolidin-5-ylidene)acetate (4o):

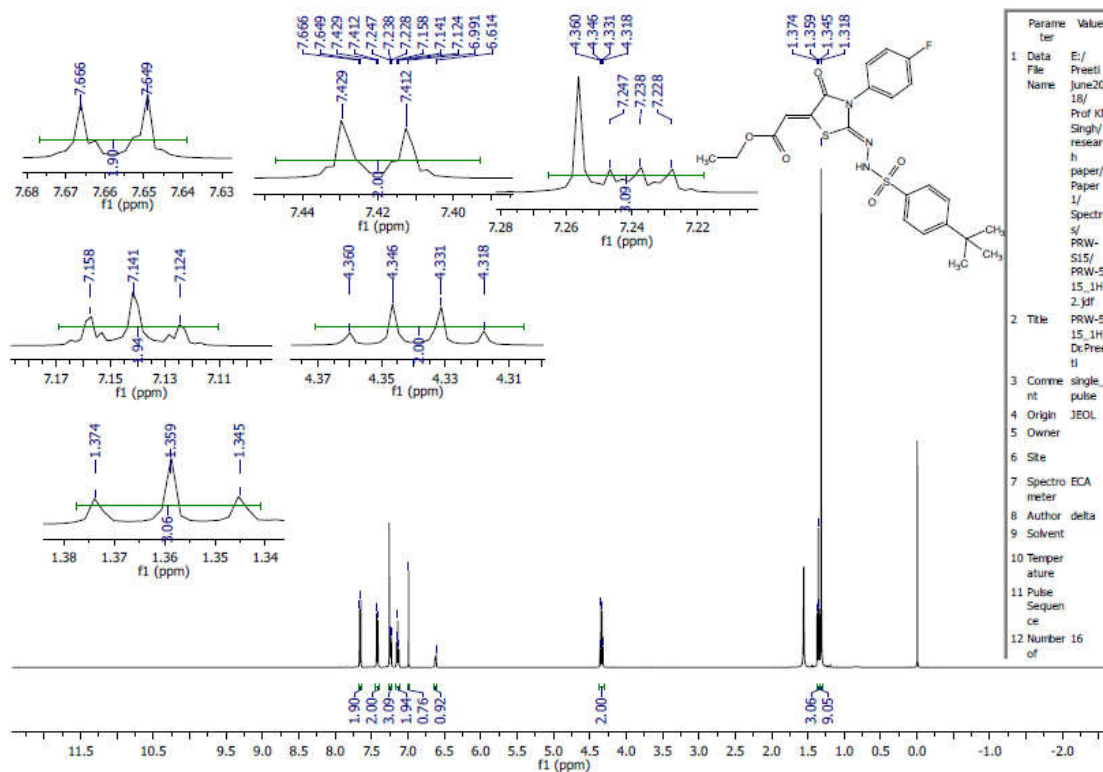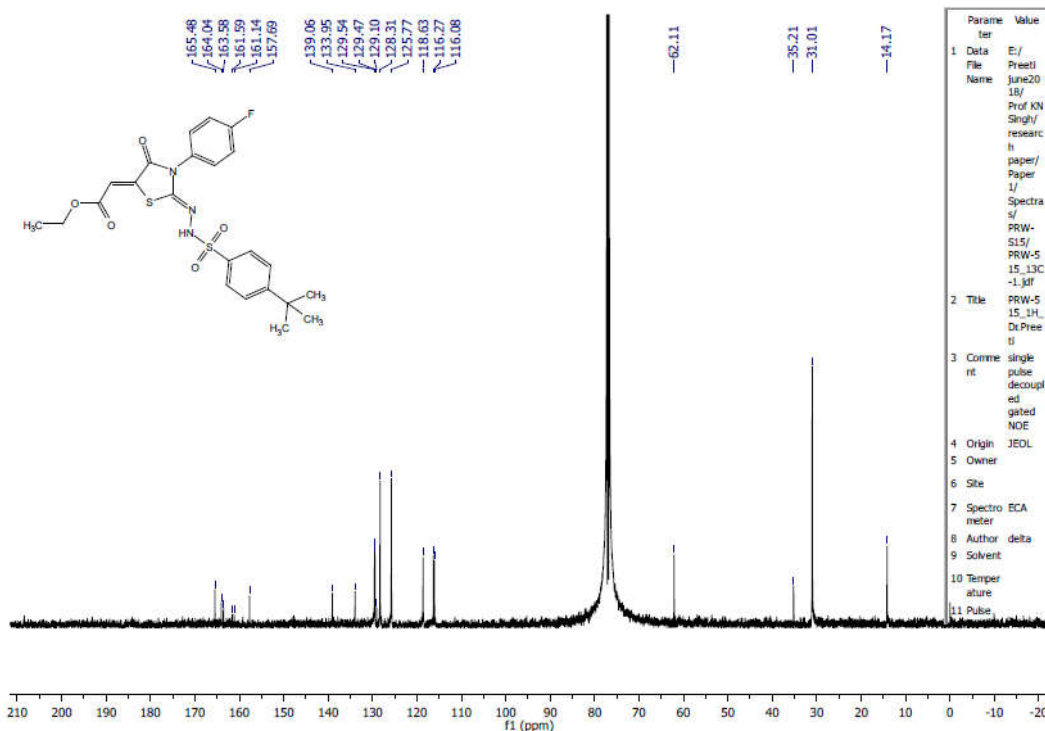

**(Z)-Ethyl 2-((Z)-3-(4-fluorophenyl)-2-(2-((4-methoxyphenyl)sulfonyl)hydrazono)-4-oxothiazolidin-5-ylidene)acetate (4p):**

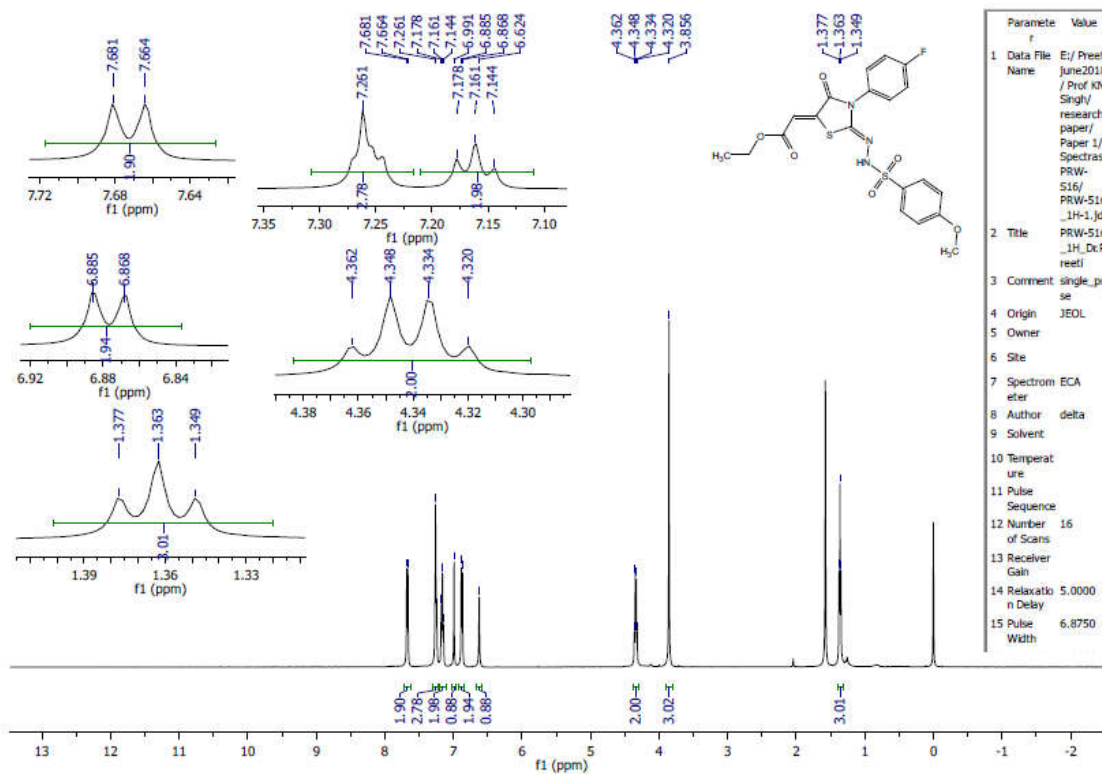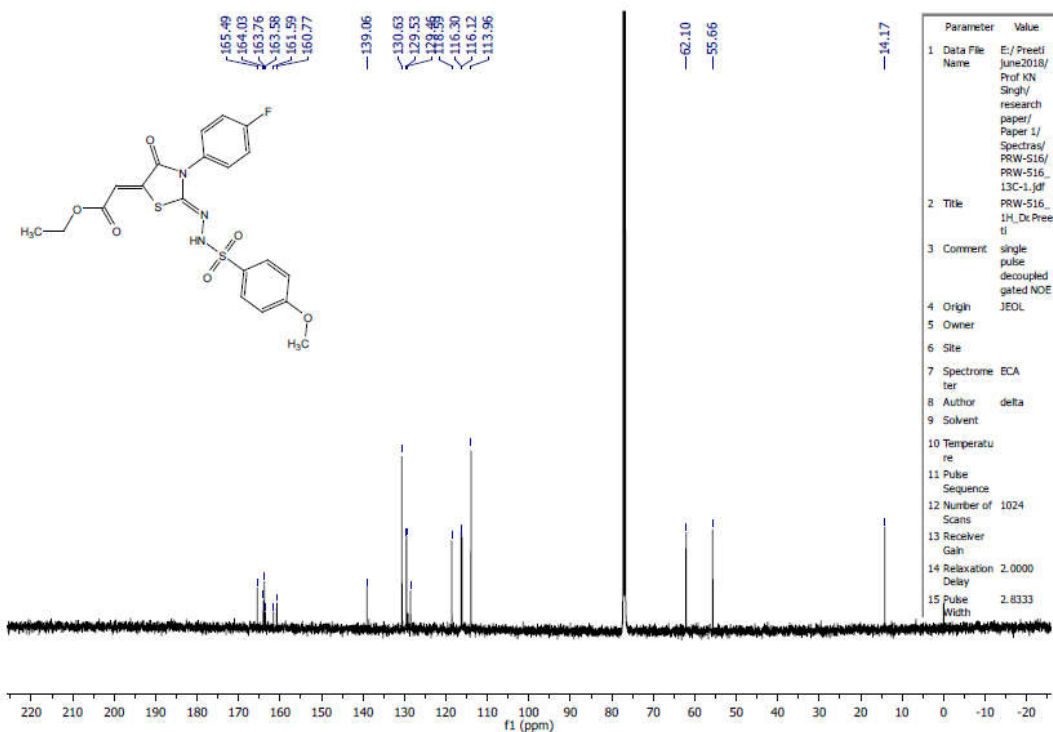



(Z)-Ethyl 2-((Z)-3-(4-methoxyphenyl)-2-(2-((4-methoxyphenyl)sulfinyl)hydrazono)-4-oxothiazolidin-5-ylidene)acetate (4r):

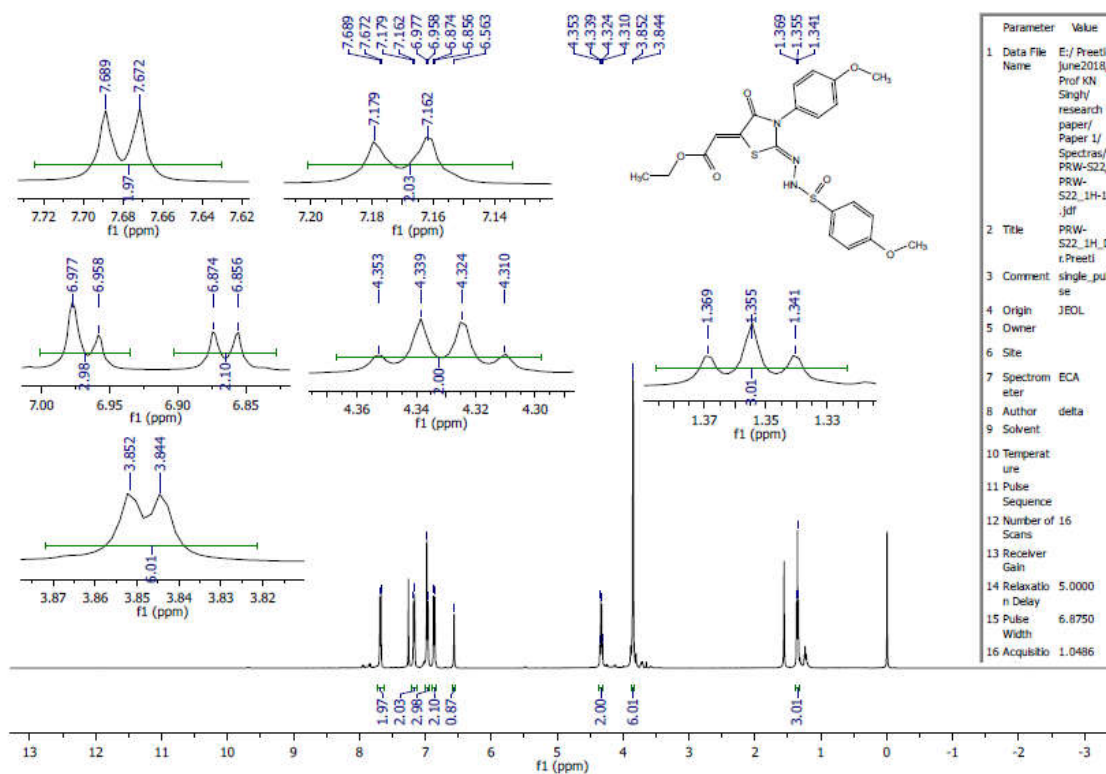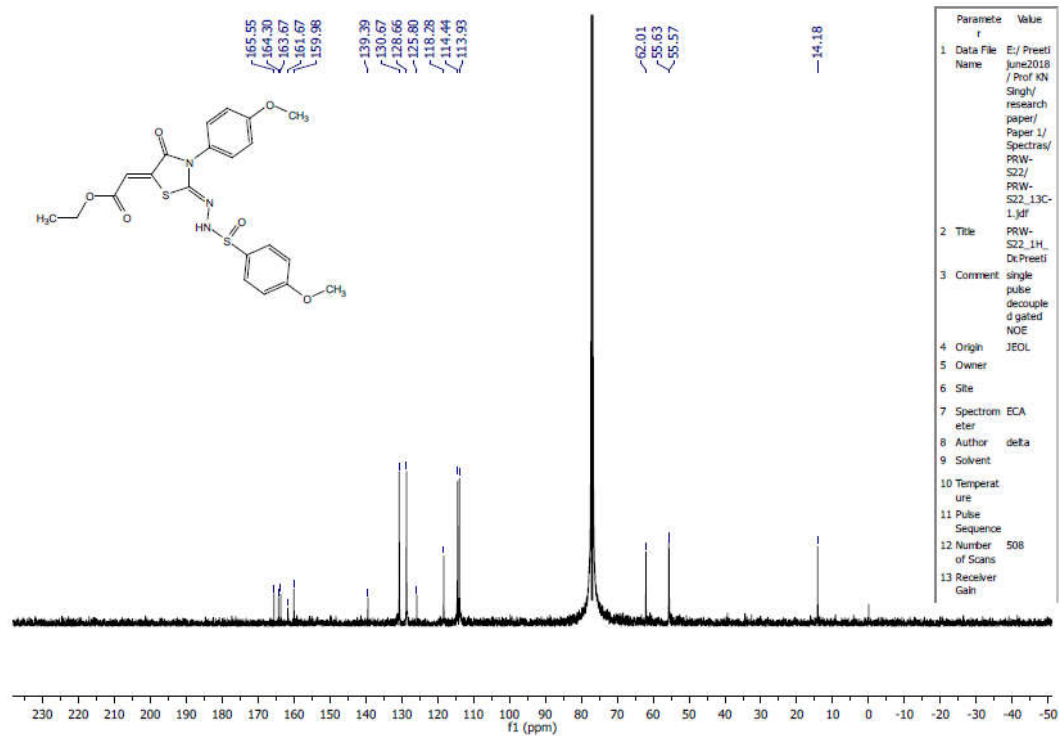

**(Z)-Methyl 2-((Z)-2-((4-(tert-butyl)phenyl)sulfinyl)hydrazono)-3-(4-nitrophenyl)-4-oxothiazolidin-5-ylidene)acetate (4s):**

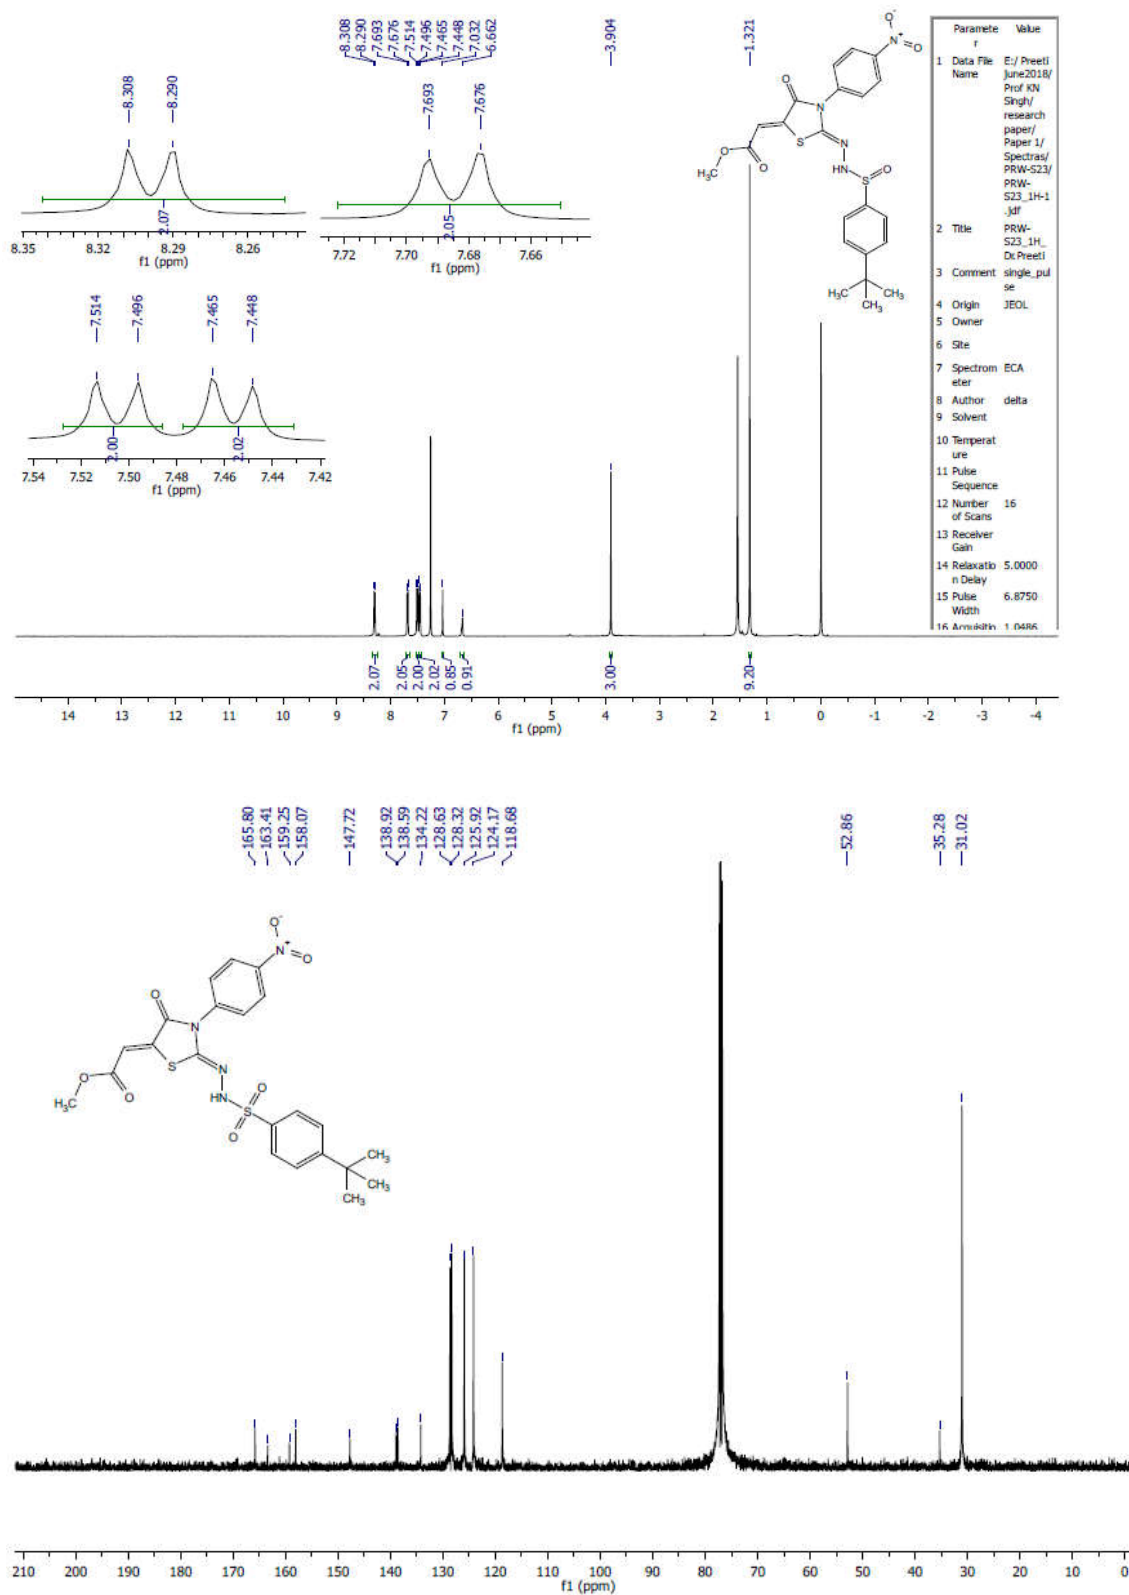

**(Z)-Ethyl 2-((Z)-2-(2-(octylsulfonyl)hydrazono)-4-oxo-3-phenylthiazolidin-5-ylidene)acetate (4t):**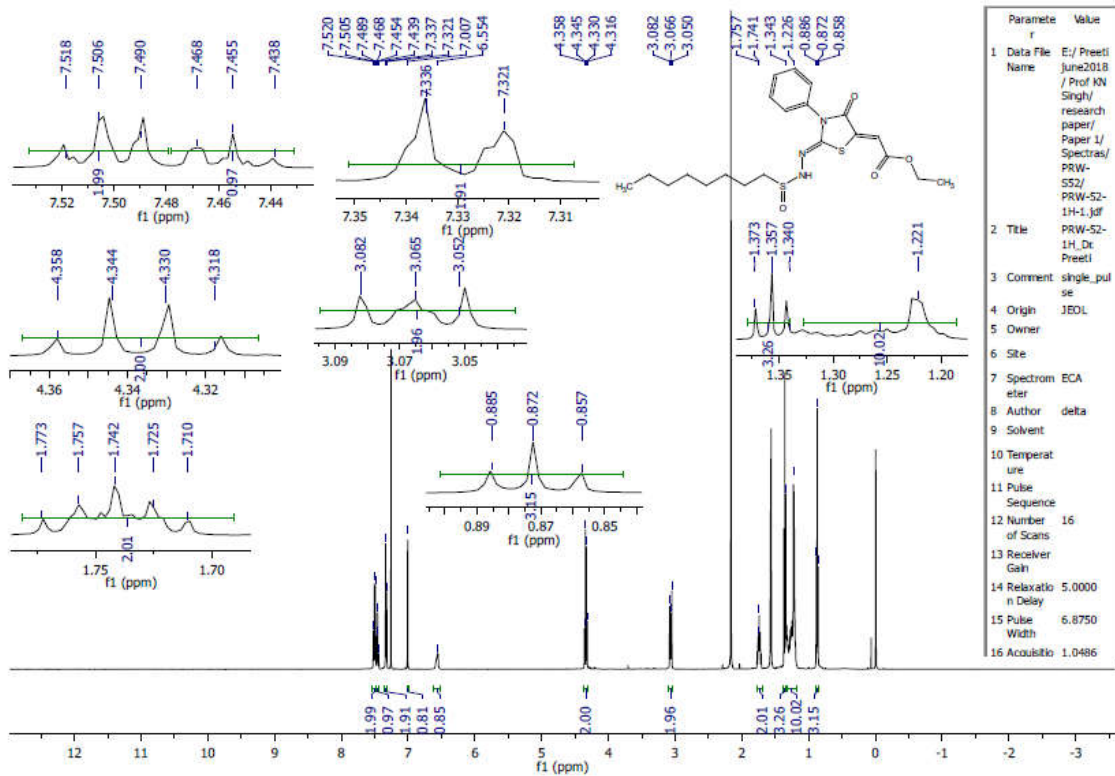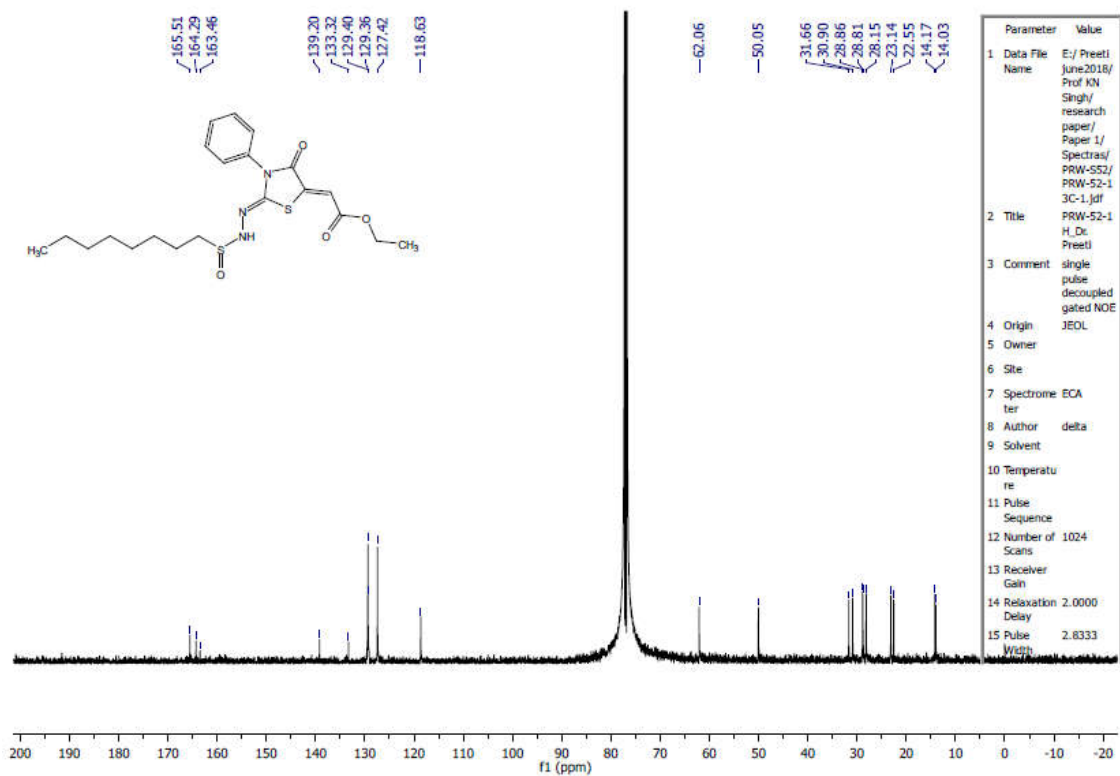



***N*-Phenyl-2-tosylhydrazinecarbothioamide (intermediate I):**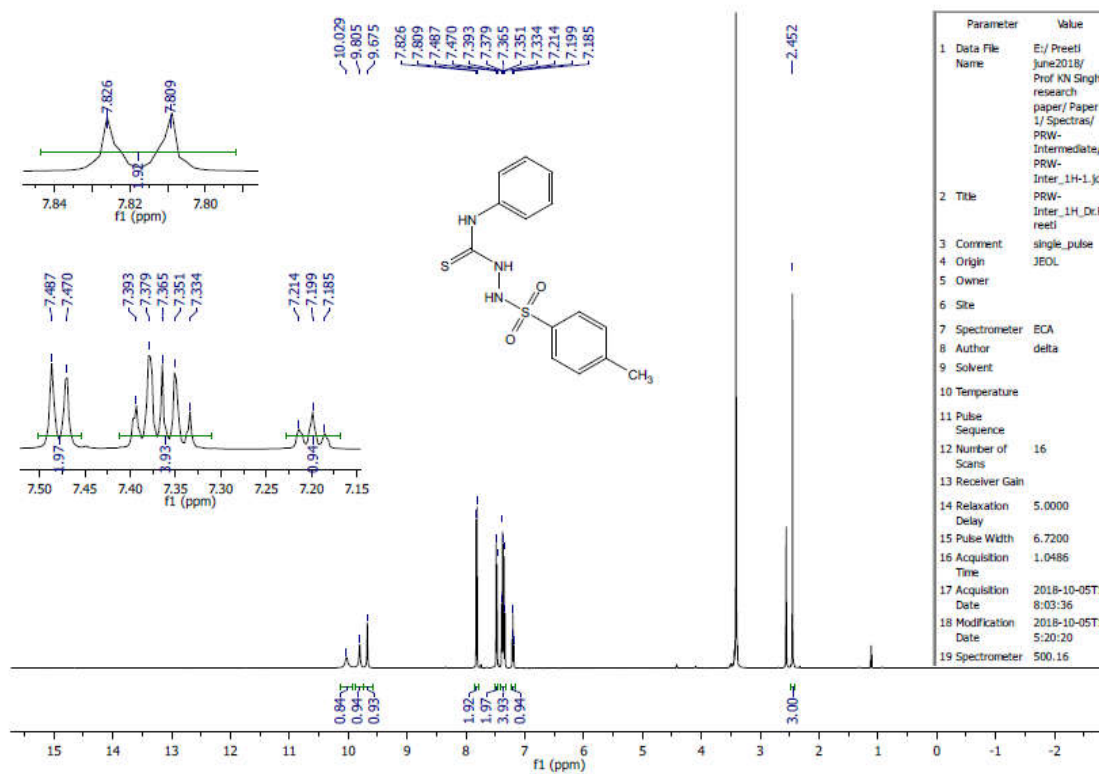

Supplement: c9nj00055k1.pdf [file c9nj00055k1.pdf]
